# Supplementary material for: Plasmodium male gametocyte development and transmission are critically regulated by the two putative deadenylases of the CAF1/CCR4/NOT complex
Source: PLoS Pathog. 2019 Jan 31;15(1):e1007164. doi: 10.1371/journal.ppat.1007164 (PMC6355032; doi:10.1371/journal.ppat.1007164)
Supplement: S3 Table — The output from the SAINT IP-MS data analysis is also shown with the PyCCR4-1::GFP bait protein manually added. Identified proteins are sorted by SAINT Scores, with highly stringent (< 0.1) being unshaded and stringent (0.1 to 0.35) hits shaded light grey, and all proteins with SAINT scores >0.35 shaded dark gray. The output files from TPP (The Trans-Proteomic Pipeline) are shown in individual tables for each control and experimental replicate. The output from the SAINT IP-MS data analysis is also shown with the PyCAF1ΔC::GFP bait protein manually added. Identified proteins are sorted by SAINT Scores, with highly stringent (< 0.1) being unshaded and stringent (0.1 to 0.35) hits shaded light grey, and all proteins with SAINT scores >0.35 shaded dark gray. (XLSX) [file ppat.1007164.s010.xlsx]

## Sheet: CCR4-1 SAINT Analysis
Bait	Prey	PreyGene	IP	Spec	SpecSum	NumRep	Prob	iProb	ctrlCounts	AvgP	MaxP	FDR
	PY17X_1237700::GFP	carbon catabolite repressor protein 4, putative (CCR4)		127|112|22	261
CCR4	PY17X_1027900	NOT family protein putative	5|6|8	97|132|19	248	3	1	1.00|1.00|1.00	0|0|0	1	1	0
CCR4	PY17X_0945600	CCR4-NOT transcription complex subunit 1 putative NOT1	5|6|8	50|46|7	103	3	1	1.00|1.00|1.00	0|0|0	1	1	0
CCR4	PY17X_1428300	CCR4-associated factor 1 putative CAF1	5|6|8	47|58|11	116	3	1	1.00|1.00|1.00	0|0|0	1	1	0
CCR4	PY17X_0933200	heat shock protein 101 putative HSP101	5|6|8	15|13|10	38	3	1	1.00|1.00|1.00	0|0|0	0.9993	1	0.0002
CCR4	PY17X_1108300	cell differentiation protein putative CAF40	5|6|8	17|20|7	44	3	1	1.00|1.00|1.00	0|0|0	0.9987	0.999	0.0004
CCR4	PY17X_1220900	ATP-dependent RNA helicase DDX6 putative DOZI	5|6|8	12|13|4	29	3	1	1.00|1.00|0.99	0|0|0	0.9957	0.998	0.0011
CCR4	PY17X_0921700	CCR4-NOT transcription complex subunit 2 putative NOT2	5|6|8	8|12|3	23	3	0.99	0.99|1.00|0.99	0|0|0	0.9923	0.999	0.002
CCR4	PY17X_1209300	eukaryotic translation initiation factor 3 subunit D putative EIF3D	5|6|8	9|9|3	21	3	0.99	1.00|1.00|0.98	0|0|0	0.9917	0.998	0.0028
CCR4	PY17X_1035100	CUGBP Elav-like family member 2 putative CELF2	5|6|8	17|21|5	43	3	0.99	0.99|1.00|0.98	1|0|0	0.9893	0.997	0.0037
CCR4	PY17X_0104900	conserved Plasmodium protein unknown function	5|6|8	17|19|3	39	3	0.99	1.00|1.00|0.97	0|0|0	0.989	0.997	0.0044
CCR4	PY17X_0814600	Ran-binding protein putative	5|6|8	8|7|4	19	3	0.98	0.99|0.99|0.96	0|0|0	0.98	0.991	0.0058
CCR4	PY17X_0307400	ATP-dependent RNA helicase UAP56 putative UAP56	5|6|8	9|4|6	19	3	0.98	1.00|0.97|0.97	0|0|0	0.9793	0.999	0.0071
CCR4	PY17X_1402200	cytoadherence linked asexual protein putative	5|6|8	12|8|3	23	3	0.95	0.98|0.96|0.91	1|0|0	0.9507	0.98	0.0155
CCR4	PY17X_0311400	T-complex protein 1 subunit theta putative CCT8	5|6|8	10|3|3	16	3	0.96	0.99|0.91|0.95	0|0|0	0.9507	0.99	0.0131
CCR4	PY17X_0109000	ornithine aminotransferase putative OAT	5|6|8	5|4|3	12	3	0.95	0.97|0.97|0.91	0|0|0	0.9507	0.974	0.0131
CCR4	PY17X_1139200	conserved Plasmodium protein unknown function	5|6|8	34|30|5	69	3	0.94	1.00|1.00|0.83	0|4|0	0.9433	0.999	0.0181
CCR4	PY17X_0926900	translation elongation factor EF-1 subunit alpha putative	5|6|8	4|6|3	13	3	0.94	0.93|0.98|0.91	0|0|0	0.941	0.98	0.0205
CCR4	PY17X_1016400	coatamer protein beta subunit putative	5|6|8	5|9|2	16	3	0.95	0.93|0.98|0.91	0|0|0	0.9407	0.983	0.0226
CCR4	PY17X_0504300	eukaryotic translation initiation factor subunit eIF2A putative	5|6|8	15|33|2	50	3	0.91	0.97|1.00|0.78	0|0|0	0.914	0.997	0.026
CCR4	PY17X_1322200	6-phosphogluconate dehydrogenase decarboxylating putative	5|6|8	6|8|1	15	3	0.91	0.98|0.99|0.75	0|0|0	0.9047	0.988	0.0294
CCR4	PY17X_0403700	exportin-1 putative	5|6|8	8|12|2	22	3	0.9	0.91|0.97|0.81	0|1|0	0.8963	0.966	0.033
CCR4	PY17X_0613400	HSP40 subfamily A putative	5|6|8	15|15|5	35	3	0.87	0.87|0.93|0.85	0|3|0	0.8833	0.929	0.0368
CCR4	PY17X_1313800	M17 leucyl aminopeptidase putative	5|6|8	7|2|2	11	3	0.88	0.97|0.81|0.85	0|0|0	0.8773	0.969	0.0405
CCR4	PY17X_0833500	high molecular weight rhoptry protein 2 RhopH2	5|6|8	18|12|13	43	3	0.88	0.90|0.85|0.88	1|3|0	0.8743	0.901	0.0441
CCR4	PY17X_0418800	high molecular weight rhoptry protein 3 putative RhopH3	5|6|8	20|9|6	35	3	0.86	0.93|0.81|0.84	3|0|0	0.859	0.93	0.0479
CCR4	PY17X_1242000	karyopherin beta putative	5|6|8	39|64|16	119	3	0.84	0.69|0.94|0.87	6|6|0	0.8343	0.941	0.0525
CCR4	PY17X_0309700	peptide chain release factor subunit 1 putative	5|6|8	3|2|2	7	3	0.83	0.87|0.83|0.78	0|0|0	0.8253	0.869	0.057
CCR4	PY17X_1034300	eukaryotic translation initiation factor 2 gamma subunit putative	5|6|8	3|3|1	7	3	0.82	0.85|0.88|0.74	0|0|0	0.824	0.882	0.0612
CCR4	PY17X_1369900	60S ribosomal protein L17 putative	5|6|8	6|6|2	14	3	0.82	0.84|0.86|0.77	1|0|0	0.82	0.855	0.0653
CCR4	PY17X_1416100	exportin-1 putative	5|6|8	3|4|2	9	3	0.81	0.78|0.85|0.81	0|0|0	0.8123	0.852	0.0694
CCR4	PY17X_1135600	T-complex protein 1 subunit delta putative CCT4	5|6|8	12|5|1	18	3	0.8	0.95|0.88|0.59	1|0|0	0.8057	0.954	0.0735
CCR4	PY17X_0913800	tudor staphylococcal nuclease putative TSN	5|6|8	7|10|1	18	3	0.81	0.89|0.93|0.58	1|0|0	0.8013	0.934	0.0774
CCR4	PY17X_0708300	protein transport protein SEC23 putative SEC23	5|6|8	2|6|2	10	3	0.8	0.64|0.92|0.84	0|0|0	0.801	0.922	0.0811
CCR4	PY17X_1221400	T-complex protein 1 subunit epsilon putative CCT5	5|6|8	4|2|1	7	3	0.8	0.88|0.81|0.70	0|0|0	0.7957	0.883	0.0847
CCR4	PY17X_0822200	heat shock protein 70 putative HSP70-2	5|6|8	17|8|5	30	3	0.78	0.88|0.72|0.77	3|0|0	0.7917	0.879	0.0882
CCR4	PY17X_0525700	tryptophan/threonine-rich antigen putative	5|6|8	2|2|2	6	3	0.78	0.80|0.83|0.75	0|0|0	0.7917	0.825	0.0915
CCR4	PY17X_1411400	meiosis-specific nuclear structural protein 1 putative	5|6|8	2|2|3	7	3	0.79	0.74|0.80|0.82	0|0|0	0.7843	0.816	0.0949
CCR4	PY17X_0621600	conserved Plasmodium protein unknown function	5|6|8	5|1|1	7	3	0.75	0.93|0.59|0.75	0|0|0	0.756	0.931	0.0988
CCR4	PY17X_0837000	conserved Plasmodium protein unknown function	5|6|8	10|11|1	22	3	0.75	0.89|0.89|0.48	2|0|0	0.7497	0.888	0.1027
CCR4	PY17X_1408400	carbamoyl phosphate synthetase putative	5|6|8	9|17|1	27	3	0.75	0.86|0.98|0.39	1|0|0	0.7437	0.979	0.1065
CCR4	PY17X_0605200	nucleosome assembly protein putative NAPL	5|6|8	8|7|5	20	3	0.74	0.71|0.78|0.75	1|1|0	0.7433	0.775	0.1102
CCR4	PY17X_1446600	T-complex protein 1 subunit gamma putative CCT3	5|6|8	12|11|1	24	3	0.75	0.91|0.91|0.40	0|2|0	0.739	0.913	0.1138
CCR4	PY17X_1021600	conserved Plasmodium protein unknown function	5|6|8	22|33|1	56	3	0.73	0.99|1.00|0.19	0|0|0	0.726	0.997	0.1175
CCR4	PY17X_1310000	tRNA binding protein putative	5|6|8	2|1|2	5	3	0.69	0.72|0.58|0.80	0|0|0	0.6983	0.797	0.1217
CCR4	PY17X_1124300	hexokinase putative	5|6|8	17|12|5	34	3	0.71	0.74|0.68|0.67	5|0|0	0.696	0.738	0.1258
CCR4	PY17X_0408800	T-complex protein 1 subunit eta putative CCT7	5|6|8	6|3|1	10	3	0.68	0.79|0.69|0.60	1|0|0	0.6923	0.787	0.1297
CCR4	PY17X_1441700	polyadenylate-binding protein putative PABP	5|6|8	43|47|7	97	3	0.68	0.79|0.83|0.44	9|4|0	0.685	0.828	0.1337
CCR4	PY17X_0838700	V-type proton ATPase subunit E putative	5|6|8	1|2|1	4	3	0.69	0.58|0.79|0.68	0|0|0	0.6813	0.786	0.1375
CCR4	PY17X_0521000	conserved Plasmodium protein unknown function	5|6|8	32|48|4	84	3	0.71	0.85|0.99|0.17	4|3|0	0.67	0.987	0.1414
CCR4	PY17X_0418300	coatomer subunit beta putative SEC27	5|6|8	2|3|1	6	3	0.67	0.61|0.76|0.64	0|0|0	0.6683	0.756	0.1452
CCR4	PY17X_0417400	40S ribosomal protein S15A putative	5|6|8	6|2|1	9	3	0.66	0.78|0.60|0.63	1|0|0	0.6663	0.777	0.1489
CCR4	PY17X_1427100	karyopherin alpha putative KARalpha	5|6|8	5|11|2	18	3	0.66	0.49|0.81|0.68	1|1|0	0.6587	0.809	0.1526
CCR4	PY17X_0420500	alpha tubulin 1	5|6|8	24|22|0	46	3	0.67	0.99|0.98|0.00	0|0|2	0.656	0.985	0.1563
CCR4	PY17X_1449000	asparagine-rich protein putative	5|6|8	18|17|0	35	3	0.65	0.97|0.98|0.00	0|0|0	0.6497	0.98	0.1598
CCR4	PY17X_1138600	protein transport protein Sec24A putative SEC24A	5|6|8	3|5|1	9	3	0.65	0.58|0.76|0.61	1|0|0	0.6477	0.756	0.1633
CCR4	PY17X_1235500	serine/arginine-rich splicing factor 1 putative SR1	5|6|8	3|3|2	8	3	0.64	0.64|0.68|0.61	1|0|0	0.6413	0.675	0.1668
CCR4	PY17X_1319500	rhoptry neck protein 2 RON2	5|6|8	3|4|2	9	3	0.63	0.48|0.72|0.70	1|0|0	0.6347	0.724	0.1703
CCR4	PY17X_0817500	elongation factor 1-beta putative	5|6|8	6|4|0	10	3	0.62	0.96|0.93|0.00	0|0|0	0.631	0.959	0.1737
CCR4	PY17X_1117900	conserved Plasmodium protein unknown function	5|6|8	8|13|2	23	3	0.63	0.58|0.74|0.56	3|0|0	0.6273	0.739	0.1771
CCR4	PY17X_1443600	haloacid dehalogenase-like hydrolase putative HAD2	5|6|8	5|2|1	8	3	0.61	0.72|0.59|0.57	1|0|0	0.6263	0.723	0.1804
CCR4	PY17X_1439800	endoplasmin putative GRP94	5|6|8	10|1|1	12	3	0.62	0.94|0.29|0.65	0|0|0	0.626	0.938	0.1836
CCR4	PY17X_1424400	importin beta putative	5|6|8	8|8|0	16	3	0.61	0.92|0.95|0.00	0|0|0	0.624	0.948	0.1867
CCR4	PY17X_0605700	eukaryotic translation initiation factor 5A putative EIF5A	5|6|8	1|1|2	4	3	0.63	0.58|0.64|0.65	0|0|0	0.6227	0.65	0.1897
CCR4	PY17X_0415700	eukaryotic translation initiation factor 4E putative eIF4E	5|6|8	12|7|0	19	3	0.61	0.95|0.91|0.00	1|0|0	0.6197	0.947	0.1927
CCR4	PY17X_1213400	PRE-binding protein putative PREBP	5|6|8	18|25|10	53	3	0.62	0.41|0.76|0.68	3|5|0	0.6157	0.758	0.1985
CCR4	PY17X_0108900	T-complex protein 1 subunit zeta putative CCT6	5|6|8	5|5|0	10	3	0.62	0.91|0.94|0.00	0|0|0	0.6157	0.939	0.1956
CCR4	PY17X_0919700	60S acidic ribosomal protein P0 putative	5|6|8	4|2|2	8	3	0.62	0.67|0.56|0.61	0|0|1	0.612	0.669	0.2013
CCR4	PY17X_0917700	T-complex protein 1 subunit alpha putative TCP1	5|6|8	16|8|0	24	3	0.61	0.96|0.87|0.00	0|2|0	0.611	0.959	0.2041
CCR4	PY17X_1144100	conserved Plasmodium protein unknown function	5|6|8	6|5|0	11	3	0.62	0.91|0.92|0.00	0|0|0	0.6107	0.923	0.2068
CCR4	PY17X_1429000	RNA helicase putative	5|6|8	9|6|0	15	3	0.63	0.92|0.90|0.00	0|0|0	0.607	0.919	0.2094
CCR4	PY17X_1217900	conserved Plasmodium protein unknown function	5|6|8	7|9|0	16	3	0.62	0.88|0.93|0.00	1|0|0	0.6053	0.932	0.212
CCR4	PY17X_1020100	60S ribosomal protein L21 putative RPL21	5|6|8	7|2|0	9	3	0.6	0.96|0.86|0.00	0|0|0	0.604	0.955	0.2146
CCR4	PY17X_1402900	40S ribosomal protein S7 putative	5|6|8	6|15|3	24	3	0.59	0.45|0.74|0.61	3|0|0	0.5993	0.743	0.2171
CCR4	PY17X_1207500	CCR4-NOT transcription complex subunit 5 putative NOT5	5|6|8	7|2|0	9	3	0.58	0.95|0.85|0.00	0|0|0	0.5983	0.947	0.2196
CCR4	PY17X_1216800	cysteine--tRNA ligase putative CysRS	5|6|8	3|2|1	6	3	0.6	0.64|0.57|0.58	1|0|0	0.5973	0.636	0.2221
CCR4	PY17X_0942100	polyadenylate-binding protein-interacting protein 1 putative PAIP1	5|6|8	19|26|0	45	3	0.62	0.84|0.95|0.00	0|0|0	0.5953	0.946	0.2245
CCR4	PY17X_0806300	importin-7 putative	5|6|8	9|7|0	16	3	0.57	0.88|0.89|0.00	0|0|0	0.5897	0.887	0.2269
CCR4	PY17X_0518100	early transcribed membrane protein ETRAMP	5|6|8	1|1|2	4	3	0.59	0.48|0.56|0.73	0|0|0	0.5863	0.725	0.2293
CCR4	PY17X_0941100	casein kinase 2 alpha subunit putative CK2alpha	5|6|8	3|4|0	7	3	0.57	0.83|0.91|0.00	0|0|0	0.58	0.906	0.2317
CCR4	PY17X_1012100	Hsp70/Hsp90 organizing protein putative HOP	5|6|8	5|0|3	8	3	0.58	0.84|0.00|0.89	0|0|0	0.5773	0.889	0.2341
CCR4	PY17X_1420600	ras-related protein Rab-11A putative RAB11a	5|6|8	4|0|2	6	3	0.58	0.92|0.00|0.81	0|0|0	0.575	0.915	0.2364
CCR4	PY17X_1032700	nuclear transport factor 2 putative NTF2	5|6|8	2|3|0	5	3	0.57	0.84|0.88|0.00	0|0|0	0.5743	0.883	0.2387
CCR4	PY17X_1110800	conserved Plasmodium protein unknown function	5|6|8	8|12|0	20	3	0.58	0.79|0.93|0.00	0|0|0	0.573	0.926	0.241
CCR4	PY17X_1104200	actin-depolymerizing factor 1 ADF1	5|6|8	2|6|0	8	3	0.53	0.81|0.91|0.00	0|0|0	0.572	0.907	0.2432
CCR4	PY17X_0311500	protein transport protein SEC31 putative SEC31	5|6|8	4|5|1	10	3	0.56	0.50|0.69|0.49	0|2|0	0.5603	0.694	0.2455
CCR4	PY17X_1017800	proliferation-associated protein 2g4 putative	5|6|8	7|0|2	9	3	0.57	0.87|0.00|0.79	1|0|0	0.555	0.874	0.2479
CCR4	PY17X_0619800	60S ribosomal protein L11a putative	5|6|8	7|6|4	17	3	0.55	0.55|0.57|0.54	3|0|0	0.5547	0.566	0.2501
CCR4	PY17X_1245500	Hsc70-interacting protein putative HIP	5|6|8	3|4|0	7	3	0.55	0.79|0.88|0.00	0|0|0	0.554	0.875	0.2524
CCR4	PY17X_0819700	6-phosphofructokinase putative PFK9	5|6|8	32|27|6	65	3	0.55	0.61|0.65|0.40	4|9|0	0.5517	0.65	0.2567
CCR4	PY17X_1304900	trailer hitch homolog putative CITH	5|6|8	7|4|0	11	3	0.54	0.86|0.80|0.00	1|0|0	0.5517	0.859	0.2546
CCR4	PY17X_1453200	clustered-asparagine-rich protein putative	5|6|8	3|3|0	6	3	0.55	0.80|0.85|0.00	0|0|0	0.548	0.848	0.2589
CCR4	PY17X_0407400	T-complex protein 1 subunit beta putative CCT2	5|6|8	10|0|1	11	3	0.54	0.96|0.00|0.65	0|0|0	0.5373	0.961	0.2611
CCR4	PY17X_0707700	RNA-binding protein putative	5|6|8	3|2|0	5	3	0.54	0.83|0.78|0.00	0|0|0	0.5353	0.827	0.2633
CCR4	PY17X_0521300	ADP/ATP transporter on adenylate translocase putative	5|6|8	9|10|2	21	3	0.53	0.53|0.62|0.45	4|0|0	0.5327	0.622	0.2654
CCR4	PY17X_1036800	plasmepsin IV PM4	5|6|8	11|6|0	17	3	0.51	0.83|0.76|0.00	2|0|0	0.531	0.833	0.2676
CCR4	PY17X_0913600	casein kinase 1 CK1	5|6|8	9|6|7	22	3	0.52	0.53|0.45|0.59	1|3|0	0.5223	0.591	0.2698
CCR4	PY17X_1352700	isoleucine--tRNA ligase putative	5|6|8	4|1|1	6	3	0.52	0.69|0.35|0.53	0|0|0	0.5217	0.685	0.2719
CCR4	PY17X_0945400	phenylalanine--tRNA ligase beta subunit putative	5|6|8	3|3|0	6	3	0.51	0.74|0.81|0.00	0|0|0	0.517	0.807	0.2741
CCR4	PY17X_1343000	60S ribosomal protein	5|6|8	10|0|2	12	3	0.51	0.85|0.00|0.70	0|0|2	0.515	0.847	0.2762
CCR4	PY17X_0205200	phenylalanine--tRNA ligase alpha subunit putative	5|6|8	4|3|0	7	3	0.5	0.77|0.75|0.00	0|0|0	0.5087	0.773	0.2784
CCR4	PY17X_0506200	ADP-ribosylation factor putative ARF1	5|6|8	8|0|1	9	3	0.51	0.87|0.00|0.65	1|0|0	0.508	0.87	0.2805
CCR4	PY17X_0905300	coatomer subunit gamma putative SEC21	5|6|8	7|3|0	10	3	0.48	0.83|0.67|0.00	0|0|0	0.5	0.826	0.2826
CCR4	PY17X_1329800	conserved Plasmodium protein unknown function	5|6|8	3|14|0	17	3	0.49	0.53|0.97|0.00	0|0|0	0.4993	0.971	0.2847
CCR4	PY17X_0720300	eukaryotic translation initiation factor 3 subunit M putative EIF3M	5|6|8	4|0|1	5	3	0.51	0.82|0.00|0.67	0|0|0	0.497	0.824	0.2868
CCR4	PY17X_1430800	eukaryotic translation initiation factor 3 subunit A putative EIF3A	5|6|8	10|5|2	17	3	0.5	0.59|0.42|0.48	1|3|0	0.4963	0.59	0.2889
CCR4	PY17X_1012400	CCR4-associated factor 16 putative CAF16	5|6|8	2|0|2	4	3	0.5	0.74|0.00|0.75	0|0|0	0.495	0.75	0.2909
CCR4	PY17X_1127900	transportin putative	5|6|8	3|9|0	12	3	0.48	0.56|0.91|0.00	0|0|0	0.4913	0.911	0.293
CCR4	PY17X_0928700	exported protein 1 putative EXP1	5|6|8	4|0|3	7	3	0.5	0.73|0.00|0.72	1|0|0	0.483	0.728	0.295
CCR4	PY17X_1116400	conserved Plasmodium protein unknown function	5|6|8	6|4|0	10	3	0.48	0.74|0.71|0.00	0|0|0	0.482	0.736	0.2971
CCR4	PY17X_1324200	conserved Plasmodium protein unknown function	5|6|8	4|3|0	7	3	0.49	0.73|0.71|0.00	1|0|0	0.4813	0.732	0.2991
CCR4	PY17X_0621800	40S ribosomal protein S5 putative	5|6|8	3|1|0	4	3	0.48	0.84|0.58|0.00	0|0|0	0.475	0.842	0.3011
CCR4	PY17X_1222500	heat shock protein 110 putative HSP110c	5|6|8	8|6|5	19	3	0.48	0.45|0.46|0.50	1|3|0	0.4713	0.505	0.3032
CCR4	PY17X_1413100	eukaryotic translation initation factor 4 gamma putative EIF4G	5|6|8	3|5|0	8	3	0.47	0.61|0.80|0.00	0|0|0	0.469	0.798	0.3052
CCR4	PY17X_0309200	asparagine--tRNA ligase putative	5|6|8	3|2|0	5	3	0.47	0.71|0.68|0.00	0|0|0	0.463	0.706	0.3072
CCR4	PY17X_0914900	protein phosphatase PPM8 putative PPM8	5|6|8	2|0|2	4	3	0.45	0.60|0.00|0.79	0|0|0	0.4617	0.786	0.3112
CCR4	PY17X_1463000	FK506-binding protein FKBP-type peptidyl-prolyl isomerase putative FKBP35	5|6|8	2|0|1	3	3	0.48	0.70|0.00|0.69	0|0|0	0.4617	0.698	0.3092
CCR4	PY17X_0703100	protein disulfide isomerase putative	5|6|8	2|0|2	4	3	0.46	0.60|0.00|0.78	0|0|0	0.4597	0.778	0.3132
CCR4	PY17X_0417500	zinc finger protein putative	5|6|8	4|2|0	6	3	0.46	0.76|0.61|0.00	0|0|0	0.4583	0.761	0.3151
CCR4	PY17X_1235900	eukaryotic translation initiation factor 3 subunit B putative EIF3B	5|6|8	2|5|0	7	3	0.45	0.53|0.84|0.00	0|0|0	0.4563	0.841	0.317
CCR4	PY17X_0806800	conserved Plasmodium protein unknown function	5|6|8	5|8|0	13	3	0.44	0.57|0.79|0.00	2|0|0	0.4523	0.785	0.3189
CCR4	PY17X_0933100	conserved Plasmodium protein unknown function	5|6|8	2|1|0	3	3	0.46	0.76|0.59|0.00	0|0|0	0.4493	0.755	0.3209
CCR4	PY17X_0714600	conserved Plasmodium protein unknown function	5|6|8	7|2|0	9	3	0.42	0.80|0.55|0.00	1|0|0	0.449	0.799	0.3227
CCR4	PY17X_0932000	AP-1 complex subunit sigma putative	5|6|8	1|2|0	3	3	0.42	0.56|0.78|0.00	0|0|0	0.4443	0.776	0.3246
CCR4	PY17X_1364900	DNA/RNA-binding protein Alba 2 putative ALBA2	5|6|8	1|2|0	3	3	0.45	0.54|0.80|0.00	0|0|0	0.4433	0.795	0.3265
CCR4	PY17X_0407800	60S ribosomal protein L7 putative	5|6|8	11|6|5	22	3	0.43	0.50|0.37|0.46	5|0|0	0.4417	0.496	0.3284
CCR4	PY17X_0715400	eukaryotic translation initiation factor 3 subunit G putative EIF3G	5|6|8	1|3|0	4	3	0.43	0.48|0.84|0.00	0|0|0	0.4387	0.836	0.3302
CCR4	PY17X_0939200	asparagine-rich antigen putative	5|6|8	4|4|0	8	3	0.44	0.63|0.68|0.00	0|0|0	0.4343	0.677	0.3321
CCR4	PY17X_1339000	exported protein 2 putative EXP2	5|6|8	4|0|4	8	3	0.44	0.56|0.00|0.74	0|0|2	0.4313	0.739	0.3339
CCR4	PY17X_0109200	conserved Plasmodium protein unknown function	5|6|8	11|29|0	40	3	0.44	0.40|0.89|0.00	5|0|0	0.4287	0.889	0.3358
CCR4	PY17X_0915200	coatomer subunit delta putative	5|6|8	4|1|0	5	3	0.42	0.81|0.47|0.00	0|0|0	0.427	0.814	0.3376
CCR4	PY17X_0419100	nucleoporin NUP100/NSP100 putative NUP100	5|6|8	3|7|0	10	3	0.44	0.46|0.82|0.00	1|0|0	0.426	0.82	0.3394
CCR4	PY17X_1030800	60S ribosomal protein L10 putative	5|6|8	5|7|6	18	3	0.42	0.30|0.51|0.47	4|0|0	0.4243	0.506	0.3412
CCR4	PY17X_0614100	ribonucleoside-diphosphate reductase large subunit putative	5|6|8	4|2|0	6	3	0.42	0.70|0.56|0.00	1|0|0	0.4213	0.702	0.343
CCR4	PY17X_0811400	proteasome subunit alpha type-3 putative	5|6|8	1|2|0	3	3	0.42	0.48|0.78|0.00	0|0|0	0.4177	0.775	0.3448
CCR4	PY17X_1212200	eukaryotic translation initiation factor 2 beta subunit putative	5|6|8	2|1|0	3	3	0.4	0.68|0.56|0.00	0|0|0	0.4153	0.683	0.3465
CCR4	PY17X_1209800	26S protease regulatory subunit 4 putative	5|6|8	2|0|1	3	3	0.41	0.60|0.00|0.65	0|0|0	0.415	0.649	0.3483
CCR4	PY17X_1246200	eukaryotic translation initiation factor 3 subunit E putative EIF3E	5|6|8	2|2|0	4	3	0.39	0.60|0.64|0.00	0|0|0	0.414	0.639	0.35
CCR4	PY17X_0718000	60S ribosomal protein L15 putative	5|6|8	9|7|0	16	3	0.42	0.61|0.62|0.00	3|0|0	0.411	0.621	0.3517
CCR4	PY17X_1313300	conserved Plasmodium protein unknown function	5|6|8	6|5|0	11	3	0.43	0.59|0.62|0.00	2|0|0	0.4027	0.617	0.3535
CCR4	PY17X_0304200	26S proteasome regulatory subunit RPN1 putative RPN1	5|6|8	2|4|0	6	3	0.4	0.46|0.73|0.00	0|0|0	0.395	0.726	0.3553
CCR4	PY17X_0930100	phosphoglycerate mutase putative PGM1	5|6|8	5|0|4	9	3	0.39	0.56|0.00|0.60	2|0|0	0.3877	0.6	0.3571
CCR4	PY17X_0822300	secreted acid phosphatase putative GAP50	5|6|8	1|0|2	3	3	0.4	0.37|0.00|0.79	0|0|0	0.3867	0.788	0.3589
CCR4	PY17X_0314300	ATP synthase F1 alpha subunit putative	5|6|8	29|8|1	38	3	0.39	0.74|0.22|0.20	7|0|0	0.3853	0.737	0.3607
CCR4	PY17X_0612800	polyubiquitin putative	5|6|8	0|9|14	23	3	0.39	0.00|0.46|0.69	0|5|0	0.3837	0.688	0.3643
CCR4	PY17X_1454000	conserved Plasmodium protein unknown function	5|6|8	1|2|0	3	3	0.38	0.44|0.71|0.00	0|0|0	0.3837	0.708	0.3643
CCR4	PY17X_1014300	voltage-dependent anion-selective channel protein putative	5|6|8	1|2|0	3	3	0.35	0.44|0.71|0.00	0|0|0	0.3823	0.709	0.366
CCR4	PY17X_1412900	2-oxoisovalerate dehydrogenase subunit alpha mitochondrial putative BCKDHA	5|6|8	24|6|0	30	3	0.38	0.83|0.30|0.00	4|0|0	0.3747	0.826	0.3678
CCR4	PY17X_0704200	receptor for activated c kinase putative RACK	5|6|8	6|11|4	21	3	0.37	0.21|0.48|0.42	3|2|0	0.3717	0.483	0.3695
CCR4	PY17X_0309900	conserved Plasmodium protein unknown function	5|6|8	3|11|0	14	3	0.37	0.20|0.90|0.00	1|0|0	0.369	0.904	0.3713
CCR4	PY17X_1034500	rhoptry-associated protein 1 putative RAP1	5|6|8	2|0|4	6	3	0.36	0.43|0.00|0.67	1|0|0	0.367	0.669	0.373
CCR4	PY17X_1024900	conserved Plasmodium protein unknown function	5|6|8	4|2|0	6	3	0.36	0.61|0.48|0.00	0|0|0	0.3637	0.61	0.3748
CCR4	PY17X_1128500	choline/ethanolaminephosphotransferase CEPT	5|6|8	1|2|0	3	3	0.36	0.42|0.67|0.00	0|0|0	0.363	0.669	0.3765
CCR4	PY17X_1437100	clathrin heavy chain putative	5|6|8	6|3|0	9	3	0.34	0.58|0.50|0.00	0|0|0	0.359	0.579	0.3782
CCR4	PY17X_1214500	autophagy-related protein 18 putative ATG18	5|6|8	2|1|0	3	3	0.35	0.59|0.49|0.00	0|0|0	0.357	0.586	0.3799
CCR4	PY17X_1138400	falcilysin putative FLN	5|6|8	3|3|0	6	3	0.32	0.50|0.57|0.00	0|0|0	0.355	0.568	0.3816
CCR4	PY17X_0107100	translation initiation factor IF-2 putative	5|6|8	7|1|0	8	3	0.35	0.87|0.19|0.00	1|0|0	0.3543	0.872	0.3833
CCR4	PY17X_1367700	glutamate--tRNA ligase putative	5|6|8	2|2|0	4	3	0.36	0.50|0.56|0.00	1|0|0	0.352	0.56	0.385
CCR4	PY17X_0803900	erythrocyte membrane-associated antigen putative	5|6|8	6|3|0	9	3	0.35	0.57|0.47|0.00	0|0|0	0.3487	0.572	0.3867
CCR4	PY17X_0404500	lipoamide acyltransferase component of branched-chain alpha-keto acid dehydrogenase complex putative BCKDH-E2	5|6|8	23|5|0	28	3	0.35	0.75|0.30|0.00	4|0|0	0.3483	0.75	0.3884
CCR4	PY17X_0524200	40S ribosomal protein S19 putative RPS19	5|6|8	6|1|4	11	3	0.35	0.42|0.16|0.44	3|0|0	0.342	0.443	0.3901
CCR4	PY17X_1366400	conserved Plasmodium protein unknown function	5|6|8	13|1|0	14	3	0.34	0.97|0.05|0.00	1|0|0	0.3397	0.969	0.3917
CCR4	PY17X_1366000	DNA/RNA-binding protein Alba 4 putative ALBA4	5|6|8	4|5|2	11	3	0.34	0.26|0.41|0.33	3|0|0	0.332	0.407	0.3934
CCR4	PY17X_1417300	DNA replication licensing factor MCM4 putative MCM4	5|6|8	0|1|2	3	3	0.33	0.00|0.28|0.72	0|0|0	0.3313	0.716	0.3951
CCR4	PY17X_1139600	RuvB-like helicase 3 putative RUVB3	5|6|8	2|1|0	3	3	0.34	0.58|0.41|0.00	0|0|0	0.331	0.579	0.3968
CCR4	PY17X_0924500	conserved Plasmodium protein unknown function	5|6|8	3|1|0	4	3	0.33	0.61|0.39|0.00	0|1|0	0.3307	0.606	0.3985
CCR4	PY17X_1361400	myosin A MyoA	5|6|8	3|0|5	8	3	0.34	0.37|0.00|0.61	2|0|0	0.3267	0.61	0.4001
CCR4	PY17X_1334000	40S ribosomal protein S3 putative	5|6|8	15|15|6	36	3	0.33	0.32|0.35|0.31	5|1|1	0.326	0.346	0.4017
CCR4	PY17X_0307600	60S ribosomal protein L37ae putative	5|6|8	2|2|0	4	3	0.31	0.47|0.50|0.00	1|0|0	0.3243	0.505	0.4034
CCR4	PY17X_0930200	conserved Plasmodium protein unknown function	5|6|8	2|2|0	4	3	0.32	0.45|0.52|0.00	0|0|0	0.324	0.521	0.405
CCR4	PY17X_0412300	conserved protein unknown function	5|6|8	13|0|0	13	3	0.32	0.96|0.00|0.00	0|0|0	0.3193	0.958	0.4066
CCR4	PY17X_1330100	cytochrome c1 precursor putative	5|6|8	10|0|0	10	3	0.33	0.96|0.00|0.00	0|0|0	0.3187	0.956	0.4082
CCR4	PY17X_0617200	eukaryotic translation initiation factor 3 subunit I putative EIF3I	5|6|8	11|1|0	12	3	0.33	0.82|0.13|0.00	0|2|0	0.3177	0.822	0.4098
CCR4	PY17X_0209500	RAP protein putative	5|6|8	27|1|0	28	3	0.32	0.79|0.16|0.00	6|0|0	0.316	0.789	0.4114
CCR4	PY17X_0111200	conserved Plasmodium protein unknown function	5|6|8	9|0|0	9	3	0.32	0.94|0.00|0.00	0|0|0	0.312	0.936	0.413
CCR4	PY17X_0419200	conserved Plasmodium protein unknown function	5|6|8	6|0|0	6	3	0.29	0.93|0.00|0.00	0|0|0	0.31	0.93	0.4146
CCR4	PY17X_0907600	conserved Plasmodium protein unknown function	5|6|8	9|0|0	9	3	0.28	0.92|0.00|0.00	1|0|0	0.3073	0.922	0.4161
CCR4	PY17X_1467700	fam-c protein	5|6|8	0|0|4	4	3	0.28	0.00|0.00|0.92	0|0|1	0.305	0.915	0.4177
CCR4	PY17X_1137700	conserved Plasmodium protein unknown function	5|6|8	6|0|0	6	3	0.28	0.91|0.00|0.00	0|0|0	0.3043	0.913	0.4193
CCR4	PY17X_0817700	conserved Plasmodium protein unknown function	5|6|8	6|0|0	6	3	0.32	0.91|0.00|0.00	0|0|0	0.304	0.912	0.4208
CCR4	PY17X_1235600	FACT complex subunit SPT16 putative FACT-L	5|6|8	0|0|4	4	3	0.3	0.00|0.00|0.91	0|0|0	0.3023	0.907	0.4224
CCR4	PY17X_1425600	40S ribosomal protein S16 putative	5|6|8	4|4|1	9	3	0.31	0.30|0.34|0.26	3|0|0	0.301	0.339	0.4239
CCR4	PY17X_0626300	tryptophan-rich antigen putative	5|6|8	0|4|0	4	3	0.31	0.00|0.90|0.00	0|0|0	0.2993	0.898	0.4269
CCR4	PY17X_1019900	protein arginine N-methyltransferase 1 putative PRMT1	5|6|8	0|4|0	4	3	0.29	0.00|0.90|0.00	0|0|0	0.2993	0.898	0.4269
CCR4	PY17X_1205500	60S ribosomal protein L13 putative	5|6|8	6|4|2	12	3	0.3	0.31|0.30|0.29	4|0|0	0.298	0.312	0.4284
CCR4	PY17X_0831900	cytochrome c oxidase subunit 5B putative COX5B	5|6|8	5|0|0	5	3	0.32	0.89|0.00|0.00	0|0|0	0.2977	0.893	0.4299
CCR4	PY17X_0411100	eukaryotic translation initiation factor 3 subunit K putative EIF3K	5|6|8	0|4|0	4	3	0.3	0.00|0.89|0.00	0|0|0	0.297	0.891	0.4314
CCR4	PY17X_0207400	conserved Plasmodium protein unknown function	5|6|8	8|0|0	8	3	0.29	0.89|0.00|0.00	1|0|0	0.2957	0.887	0.4343
CCR4	PY17X_0206600	conserved Plasmodium protein unknown function	5|6|8	5|2|0	7	3	0.31	0.52|0.37|0.00	0|0|0	0.2957	0.522	0.4328
CCR4	PY17X_1410300	mitochondrial ATP synthase delta subunit putative	5|6|8	4|0|0	4	3	0.3	0.88|0.00|0.00	0|0|0	0.293	0.879	0.4357
CCR4	PY17X_1230000	proteasome subunit beta type-4 putative	5|6|8	4|0|0	4	3	0.29	0.88|0.00|0.00	0|0|0	0.2927	0.878	0.4371
CCR4	PY17X_0831200	conserved Plasmodium protein unknown function	5|6|8	4|0|0	4	3	0.26	0.88|0.00|0.00	0|0|0	0.2917	0.875	0.4386
CCR4	PY17X_0925200	conserved Plasmodium protein unknown function	5|6|8	12|0|0	12	3	0.28	0.87|0.00|0.00	2|0|0	0.2913	0.874	0.44
CCR4	PY17X_0811100	conserved Plasmodium protein unknown function	5|6|8	2|9|0	11	3	0.29	0.12|0.75|0.00	2|0|0	0.2903	0.752	0.4414
CCR4	PY17X_1008400	DnaJ protein putative	5|6|8	6|0|0	6	3	0.3	0.87|0.00|0.00	0|0|0	0.29	0.87	0.4428
CCR4	PY17X_1436600	arginine--tRNA ligase putative	5|6|8	1|2|0	3	3	0.29	0.31|0.56|0.00	0|0|0	0.2897	0.563	0.4441
CCR4	PY17X_1027200	conserved Plasmodium protein unknown function	5|6|8	4|0|0	4	3	0.3	0.87|0.00|0.00	0|0|0	0.289	0.867	0.4455
CCR4	PY17X_1205000	40S ribosomal protein S20e putative	5|6|8	5|0|0	5	3	0.28	0.87|0.00|0.00	0|0|0	0.2887	0.866	0.4468
CCR4	PY17X_1357100	60S ribosomal protein L6-2 putative	5|6|8	13|3|3	19	3	0.29	0.41|0.14|0.31	6|0|0	0.2843	0.406	0.4482
CCR4	PY17X_0507800	citrate synthase mitochondrial precursor putative CS	5|6|8	13|12|0	25	3	0.28	0.38|0.48|0.00	7|0|0	0.284	0.477	0.4495
CCR4	PY17X_1217500	enolase putative ENO	5|6|8	28|40|6	74	3	0.28	0.27|0.37|0.22	13|2|0	0.284	0.37	0.4509
CCR4	PY17X_1307300	conserved Plasmodium protein unknown function	5|6|8	3|0|0	3	3	0.28	0.85|0.00|0.00	0|0|0	0.2837	0.851	0.4522
CCR4	PY17X_0718900	small GTP-binding protein sar1 putative	5|6|8	3|0|0	3	3	0.29	0.85|0.00|0.00	0|0|0	0.2817	0.845	0.4561
CCR4	PY17X_1247400	cell cycle regulator protein putative	5|6|8	3|0|0	3	3	0.29	0.85|0.00|0.00	0|0|0	0.2817	0.845	0.4561
CCR4	PY17X_1338800	proteasome subunit beta type-2 putative	5|6|8	3|0|0	3	3	0.3	0.85|0.00|0.00	0|0|0	0.2817	0.845	0.4561
CCR4	PY17X_1213900	ubiquinol-cytochrome c reductase complex subunit putative	5|6|8	3|0|0	3	3	0.27	0.84|0.00|0.00	0|0|0	0.28	0.84	0.4587
CCR4	PY17X_1406600	26S protease regulatory subunit 10B putative RPT4	5|6|8	0|0|2	2	3	0.29	0.00|0.00|0.84	0|0|0	0.28	0.84	0.4587
CCR4	PY17X_0406800	activator of Hsp90 ATPase putative AHA1	5|6|8	1|2|0	3	3	0.25	0.31|0.53|0.00	1|0|0	0.2787	0.531	0.4599
CCR4	PY17X_0612400	heat shock protein DNAJ homologue Pfj4 putative	5|6|8	3|0|0	3	3	0.25	0.83|0.00|0.00	0|0|0	0.2777	0.833	0.4612
CCR4	PY17X_0938500	replication factor C subunit 5 putative RFC5	5|6|8	0|0|2	2	3	0.28	0.00|0.00|0.83	0|0|0	0.2767	0.83	0.4625
CCR4	PY17X_1314100	conserved Plasmodium protein unknown function fragment	5|6|8	1|5|0	6	3	0.26	0.06|0.76|0.00	1|0|0	0.2753	0.762	0.4637
CCR4	PY17X_1360000	60S ribosomal protein L18 putative	5|6|8	12|8|6	26	3	0.28	0.30|0.27|0.25	4|0|2	0.2743	0.304	0.4662
CCR4	PY17X_1458600	40S ribosomal protein S17 putative	5|6|8	8|7|0	15	3	0.26	0.41|0.41|0.00	4|0|0	0.2743	0.413	0.4662
CCR4	PY17X_0524100	alpha tubulin 2	5|6|8	29|23|13	65	3	0.27	0.26|0.28|0.28	10|5|0	0.274	0.284	0.4674
CCR4	PY17X_0717800	GTP:AMP phosphotransferase putative GAK	5|6|8	3|0|0	3	3	0.25	0.81|0.00|0.00	0|0|0	0.2707	0.812	0.4686
CCR4	PY17X_1454600	conserved Plasmodium protein unknown function	5|6|8	0|5|0	5	3	0.27	0.00|0.81|0.00	1|0|0	0.27	0.81	0.4698
CCR4	PY17X_1235200	60S ribosomal protein L12 putative	5|6|8	8|6|5	19	3	0.27	0.27|0.28|0.25	5|0|0	0.2693	0.282	0.471
CCR4	PY17X_1020000	transcription factor 3b putative	5|6|8	0|0|3	3	3	0.27	0.00|0.00|0.81	0|0|0	0.269	0.807	0.4722
CCR4	PY17X_1210400	adenylate kinase putative AK1	5|6|8	3|0|0	3	3	0.27	0.80|0.00|0.00	0|0|0	0.268	0.804	0.4746
CCR4	PY17X_1122900	conserved Plasmodium protein unknown function	5|6|8	2|0|0	2	3	0.29	0.80|0.00|0.00	0|0|0	0.268	0.804	0.4746
CCR4	PY17X_0708000	conserved Plasmodium protein unknown function	5|6|8	6|1|0	7	3	0.26	0.59|0.21|0.00	0|0|0	0.2673	0.589	0.4758
CCR4	PY17X_0812200	ATP-dependent protease ATPase subunit ClpY putative ClpY	5|6|8	10|0|0	10	3	0.26	0.80|0.00|0.00	2|0|0	0.266	0.798	0.4793
CCR4	PY17X_1321200	co-chaperone p23 putative P23	5|6|8	3|0|0	3	3	0.29	0.80|0.00|0.00	0|0|0	0.266	0.798	0.4793
CCR4	PY17X_1118200	histone H3 variant putative H3.3	5|6|8	0|0|8	8	3	0.28	0.00|0.00|0.80	0|0|0	0.266	0.798	0.4793
CCR4	PY17X_0619900	40S ribosomal protein S10 putative	5|6|8	6|0|0	6	3	0.27	0.79|0.00|0.00	1|0|0	0.262	0.786	0.4816
CCR4	PY17X_1336100	conserved Plasmodium protein unknown function	5|6|8	0|0|3	3	3	0.25	0.00|0.00|0.79	0|2|0	0.262	0.786	0.4816
CCR4	PY17X_1210100	tubulin beta chain putative	5|6|8	37|41|18	96	3	0.25	0.19|0.31|0.29	12|2|5	0.2617	0.307	0.4827
CCR4	PY17X_1239000	adenosylhomocysteinase putative	5|6|8	8|5|4	17	3	0.25	0.27|0.25|0.27	2|3|0	0.2607	0.268	0.4838
CCR4	PY17X_1120400	conserved Plasmodium protein unknown function	5|6|8	2|0|0	2	3	0.27	0.78|0.00|0.00	0|0|0	0.2603	0.781	0.4849
CCR4	PY17X_1219700	peptidyl-prolyl cis-trans isomerase putative CYP19A	5|6|8	7|2|2	11	3	0.25	0.35|0.16|0.27	4|0|0	0.2593	0.346	0.4861
CCR4	PY17X_0826700	phosphoglycerate kinase putative PGK	5|6|8	13|6|8	27	3	0.26	0.26|0.15|0.37	9|0|0	0.2577	0.365	0.4894
CCR4	PY17X_0822600	eukaryotic translation initiation factor 3 subunit F putative EIF3F	5|6|8	3|0|0	3	3	0.26	0.77|0.00|0.00	0|0|0	0.2577	0.773	0.4894
CCR4	PY17X_0705500	conserved Plasmodium protein unknown function	5|6|8	2|0|0	2	3	0.28	0.77|0.00|0.00	0|0|0	0.2577	0.773	0.4894
CCR4	PY17X_1355800	tryptophan--tRNA ligase putative	5|6|8	1|2|0	3	3	0.24	0.27|0.50|0.00	0|0|0	0.2573	0.503	0.4915
CCR4	PY17X_1362400	kelch protein K13 putative	5|6|8	0|0|2	2	3	0.24	0.00|0.00|0.77	0|0|0	0.2573	0.772	0.4915
CCR4	PY17X_1414500	conserved Plasmodium protein unknown function	5|6|8	4|0|0	4	3	0.28	0.77|0.00|0.00	0|0|0	0.257	0.771	0.4926
CCR4	PY17X_1218800	40S ribosomal protein S3A putative	5|6|8	20|11|6	37	3	0.26	0.29|0.23|0.25	7|0|2	0.2563	0.286	0.4947
CCR4	PY17X_1462100	myosin A tail domain interacting protein MTIP	5|6|8	0|0|2	2	3	0.26	0.00|0.00|0.77	0|0|0	0.2563	0.769	0.4947
CCR4	PY17X_1307100	ubiquinol-cytochrome c reductase iron-sulfur subunit putative	5|6|8	13|0|0	13	3	0.27	0.77|0.00|0.00	3|0|0	0.256	0.768	0.4958
CCR4	PY17X_0107800	conserved Plasmodium protein unknown function	5|6|8	5|2|0	7	3	0.25	0.47|0.30|0.00	0|0|0	0.254	0.467	0.4968
CCR4	PY17X_1335800	conserved Plasmodium protein unknown function	5|6|8	2|0|0	2	3	0.28	0.76|0.00|0.00	0|0|0	0.2527	0.758	0.4979
CCR4	PY17X_1118100	histone H2A putative H2A	5|6|8	0|0|5	5	3	0.25	0.00|0.00|0.76	0|0|0	0.2523	0.757	0.4989
CCR4	PY17X_0715600	conserved Plasmodium protein unknown function	5|6|8	2|0|0	2	3	0.26	0.75|0.00|0.00	0|0|0	0.2513	0.754	0.4999
CCR4	PY17X_0512500	merozoite capping protein 1 putative nPrx	5|6|8	0|3|9	12	3	0.26	0.00|0.17|0.58	0|2|2	0.2497	0.579	0.501
CCR4	PY17X_0519300	flavoprotein subunit of succinate dehydrogenase putative	5|6|8	5|0|0	5	3	0.25	0.75|0.00|0.00	0|0|0	0.2493	0.748	0.502
CCR4	PY17X_0826400	S-adenosylmethionine synthetase putative	5|6|8	0|3|0	3	3	0.23	0.00|0.75|0.00	0|0|0	0.2483	0.745	0.503
CCR4	PY17X_0811700	tubulin-specific chaperone putative	5|6|8	0|2|0	2	3	0.23	0.00|0.74|0.00	0|0|0	0.248	0.744	0.504
CCR4	PY17X_1360900	aconitate hydratase putative	5|6|8	15|0|0	15	3	0.25	0.74|0.00|0.00	4|0|0	0.2473	0.742	0.505
CCR4	PY17X_1232500	Plasmodium exported protein PHIST unknown function	5|6|8	3|2|0	5	3	0.25	0.39|0.35|0.00	2|0|0	0.247	0.39	0.506
CCR4	PY17X_1025400	conserved Plasmodium protein unknown function	5|6|8	0|3|0	3	3	0.24	0.00|0.74|0.00	0|0|0	0.2463	0.739	0.507
CCR4	PY17X_0945700	casein kinase II beta chain putative	5|6|8	0|2|0	2	3	0.25	0.00|0.74|0.00	0|0|0	0.246	0.738	0.508
CCR4	PY17X_1104500	60S ribosomal protein L31 putative RPL31	5|6|8	3|0|1	4	3	0.25	0.37|0.00|0.36	2|0|0	0.244	0.371	0.509
CCR4	PY17X_1345800	conserved Plasmodium protein unknown function	5|6|8	2|0|0	2	3	0.24	0.72|0.00|0.00	0|0|0	0.241	0.723	0.51
CCR4	PY17X_1118600	ribosomal protein L27a putative	5|6|8	6|3|0	9	3	0.23	0.39|0.33|0.00	3|0|0	0.24	0.392	0.511
CCR4	PY17X_1133400	serine/threonine protein phosphatase 5 putative PP5	5|6|8	5|0|0	5	3	0.24	0.72|0.00|0.00	0|0|0	0.239	0.717	0.512
CCR4	PY17X_1226200	conserved Plasmodium protein unknown function	5|6|8	0|0|2	2	3	0.25	0.00|0.00|0.71	0|0|0	0.2377	0.713	0.5129
CCR4	PY17X_0717600	coatomer subunit zeta putative	5|6|8	2|0|0	2	3	0.24	0.71|0.00|0.00	0|0|0	0.2363	0.709	0.5139
CCR4	PY17X_1345100	oxidoreductase putative	5|6|8	3|0|0	3	3	0.26	0.71|0.00|0.00	0|0|0	0.236	0.708	0.5159
CCR4	PY17X_0922200	cochaperone prefoldin complex subunit putative	5|6|8	2|0|0	2	3	0.21	0.71|0.00|0.00	0|0|0	0.236	0.708	0.5159
CCR4	PY17X_0420700	conserved Plasmodium protein unknown function	5|6|8	3|11|0	14	3	0.24	0.17|0.54|0.00	4|0|0	0.2347	0.536	0.5178
CCR4	PY17X_0820000	conserved Plasmodium protein unknown function	5|6|8	2|0|0	2	3	0.21	0.70|0.00|0.00	0|0|0	0.2347	0.704	0.5168
CCR4	PY17X_1224700	50S ribosomal protein L1 mitochondrial putative RPL1	5|6|8	3|0|0	3	3	0.23	0.70|0.00|0.00	0|0|0	0.2343	0.703	0.5187
CCR4	PY17X_1412200	V-type proton ATPase catalytic subunit A putative	5|6|8	4|0|0	4	3	0.23	0.70|0.00|0.00	1|0|0	0.234	0.702	0.5197
CCR4	PY17X_1021000	60S ribosomal protein L5 putative	5|6|8	21|11|7	39	3	0.22	0.27|0.20|0.23	8|2|0	0.2327	0.272	0.5216
CCR4	PY17X_1308900	60S ribosomal protein L10a putative	5|6|8	0|0|2	2	3	0.22	0.00|0.00|0.70	1|0|0	0.2327	0.698	0.5216
CCR4	PY17X_0834400	merozoite surface protein 1 MSP1	5|6|8	0|0|3	3	3	0.24	0.00|0.00|0.70	0|0|0	0.2323	0.697	0.5225
CCR4	PY17X_0821000	RNA-binding protein musashi putative HoMu	5|6|8	5|1|0	6	3	0.24	0.48|0.21|0.00	2|0|0	0.2303	0.483	0.5234
CCR4	PY17X_0939100	vacuolar protein sorting-associated protein 35 putative VPS35	5|6|8	1|2|0	3	3	0.23	0.23|0.46|0.00	0|0|0	0.2287	0.461	0.5243
CCR4	PY17X_1353100	conserved Plasmodium protein unknown function	5|6|8	2|0|0	2	3	0.23	0.68|0.00|0.00	0|0|0	0.228	0.684	0.5253
CCR4	PY17X_1458700	rab specific GDP dissociation inhibitor putative rabGDI	5|6|8	3|0|1	4	3	0.22	0.35|0.00|0.34	2|0|0	0.2277	0.347	0.5271
CCR4	PY17X_0213800	conserved Plasmodium protein unknown function	5|6|8	2|0|0	2	3	0.22	0.68|0.00|0.00	0|0|0	0.2277	0.683	0.5271
CCR4	PY17X_0209200	conserved Plasmodium protein unknown function	5|6|8	3|0|0	3	3	0.24	0.68|0.00|0.00	0|0|0	0.2273	0.682	0.528
CCR4	PY17X_1136500	HVA22-like protein putative	5|6|8	3|0|1	4	3	0.22	0.35|0.00|0.33	2|0|0	0.2267	0.351	0.5289
CCR4	PY17X_1364300	isocitrate dehydrogenase [NADP] mitochondrial putative IDH	5|6|8	23|10|0	33	3	0.22	0.45|0.23|0.00	11|0|0	0.2263	0.449	0.5298
CCR4	PY17X_1241100	mitochondrial processing peptidase alpha subunit putative	5|6|8	20|1|0	21	3	0.24	0.62|0.06|0.00	7|0|0	0.2253	0.615	0.5307
CCR4	PY17X_1145400	ABC transporter E family member 1 putative ABCE1	5|6|8	4|0|0	4	3	0.2	0.66|0.00|0.00	0|0|0	0.221	0.663	0.5325
CCR4	PY17X_0106900	coatomer alpha subunit putative	5|6|8	2|2|0	4	3	0.21	0.30|0.37|0.00	0|0|0	0.221	0.367	0.5325
CCR4	PY17X_0905000	dynamin-like protein putative	5|6|8	18|25|5	48	3	0.23	0.15|0.31|0.20	7|7|1	0.2207	0.31	0.5334
CCR4	PY17X_1353900	chaperone binding protein putative	5|6|8	3|0|0	3	3	0.23	0.66|0.00|0.00	0|0|0	0.2203	0.661	0.5343
CCR4	PY17X_1307600	triosephosphate isomerase putative TIM	5|6|8	2|0|0	2	3	0.23	0.66|0.00|0.00	0|0|0	0.2187	0.656	0.5352
CCR4	PY17X_1131800	proteasome subunit alpha type-4 putative	5|6|8	2|0|0	2	3	0.23	0.66|0.00|0.00	0|0|0	0.2183	0.655	0.536
CCR4	PY17X_1141500	conserved Plasmodium protein unknown function	5|6|8	1|2|0	3	3	0.2	0.20|0.46|0.00	1|0|0	0.218	0.457	0.5369
CCR4	PY17X_1455100	calcyclin binding protein putative	5|6|8	2|0|0	2	3	0.21	0.65|0.00|0.00	0|0|0	0.216	0.648	0.5378
CCR4	PY17X_0613600	succinyl-CoA ligase putative	5|6|8	44|5|0	49	3	0.22	0.62|0.02|0.00	17|0|0	0.2117	0.619	0.5387
CCR4	PY17X_1037800	glideosome associated protein with multiple membrane spans 3 putative GAPM3	5|6|8	2|0|0	2	3	0.22	0.63|0.00|0.00	0|0|0	0.2113	0.634	0.5396
CCR4	PY17X_1465600	osmiophilic body protein putative G377	5|6|8	0|0|3	3	3	0.21	0.00|0.00|0.63	0|0|0	0.2107	0.632	0.5404
CCR4	PY17X_0102600	MYND finger protein putative	5|6|8	2|0|0	2	3	0.21	0.63|0.00|0.00	0|0|0	0.2103	0.631	0.5413
CCR4	PY17X_0108700	proteasome subunit alpha type-2 putative	5|6|8	2|0|0	2	3	0.2	0.63|0.00|0.00	0|0|0	0.2093	0.628	0.5422
CCR4	PY17X_0407500	40S ribosomal protein S23 putative	5|6|8	2|1|2	5	3	0.21	0.21|0.18|0.24	1|0|1	0.209	0.24	0.543
CCR4	PY17X_0212700	cysteine desulfurase putative NFS	5|6|8	6|0|0	6	3	0.21	0.62|0.00|0.00	2|0|0	0.208	0.624	0.5439
CCR4	PY17X_1415600	zinc finger CCCH type protein putative	5|6|8	0|2|0	2	3	0.21	0.00|0.62|0.00	0|0|0	0.2073	0.622	0.5448
CCR4	PY17X_0405000	EH Eps15 homology protein putative	5|6|8	3|0|0	3	3	0.21	0.62|0.00|0.00	0|0|0	0.207	0.621	0.5456
CCR4	PY17X_0212900	proteasome subunit alpha type-5 putative	5|6|8	2|0|0	2	3	0.22	0.62|0.00|0.00	0|0|0	0.2063	0.619	0.5465
CCR4	PY17X_1035700	conserved Plasmodium protein unknown function	5|6|8	4|3|0	7	3	0.2	0.31|0.30|0.00	3|0|0	0.202	0.31	0.5473
CCR4	PY17X_1456100	mitochondrial ribosomal protein L23 precursor putative	5|6|8	2|0|0	2	3	0.2	0.60|0.00|0.00	0|0|0	0.2013	0.604	0.5482
CCR4	PY17X_0715700	phosphoglucomutase-2 PGM2	5|6|8	2|0|0	2	3	0.19	0.60|0.00|0.00	0|0|0	0.201	0.603	0.549
CCR4	PY17X_1418000	40S ribosomal protein S19 putative RPS19	5|6|8	4|6|1	11	3	0.2	0.19|0.26|0.15	3|1|0	0.1997	0.264	0.5499
CCR4	PY17X_0514700	adenosine deaminase ADA	5|6|8	2|0|0	2	3	0.19	0.60|0.00|0.00	0|0|0	0.199	0.597	0.5507
CCR4	PY17X_0607300	eukaryotic translation initiation factor 3 subunit C putative EIF3C	5|6|8	8|7|0	15	3	0.2	0.29|0.31|0.00	2|3|0	0.1987	0.305	0.5524
CCR4	PY17X_0831400	fumarate hydratase putative FH	5|6|8	4|0|0	4	3	0.2	0.60|0.00|0.00	0|0|0	0.1987	0.596	0.5516
CCR4	PY17X_0815500	conserved Plasmodium protein unknown function	5|6|8	2|1|0	3	3	0.2	0.33|0.26|0.00	2|0|0	0.1973	0.331	0.5532
CCR4	PY17X_1208200	RNA-binding protein putative	5|6|8	8|7|4	19	3	0.19	0.20|0.22|0.17	4|2|0	0.1973	0.22	0.5541
CCR4	PY17X_1451500	aspartyl protease putative	5|6|8	3|0|0	3	3	0.2	0.59|0.00|0.00	0|0|0	0.197	0.591	0.5557
CCR4	PY17X_0707000	dicarboxylate/tricarboxylate carrier putative DTC	5|6|8	2|0|0	2	3	0.21	0.59|0.00|0.00	0|0|0	0.197	0.591	0.5557
CCR4	PY17X_1411600	ATP synthase subunit gamma mitochondrial putative	5|6|8	6|0|0	6	3	0.2	0.59|0.00|0.00	2|0|0	0.1967	0.59	0.5565
CCR4	PY17X_1414200	conserved Plasmodium protein unknown function	5|6|8	7|0|0	7	3	0.18	0.59|0.00|0.00	3|0|0	0.196	0.588	0.5573
CCR4	PY17X_0622600	GTP-binding protein putative	5|6|8	2|0|0	2	3	0.2	0.57|0.00|0.00	0|0|0	0.1913	0.574	0.5581
CCR4	PY17X_0606800	conserved Plasmodium protein unknown function	5|6|8	2|0|0	2	3	0.2	0.57|0.00|0.00	0|0|0	0.1897	0.569	0.559
CCR4	PY17X_1414800	lipoate-protein ligase 1 putative LipL1	5|6|8	2|0|0	2	3	0.19	0.55|0.00|0.00	0|0|0	0.1837	0.551	0.5598
CCR4	PY17X_1420800	dihydrolipoyllysine-residue succinyltransferase component of 2-oxoglutarate dehydrogenase complex putative	5|6|8	94|81|2	177	3	0.18	0.26|0.29|0.00	61|25|0	0.1827	0.288	0.5606
CCR4	PY17X_0913700	signal recognition particle subunit SRP72 putative SRP72	5|6|8	3|0|0	3	3	0.19	0.55|0.00|0.00	0|0|0	0.1827	0.548	0.5615
CCR4	PY17X_1118800	malate dehydrogenase putative MDH	5|6|8	3|0|0	3	3	0.16	0.55|0.00|0.00	1|0|0	0.1823	0.547	0.5623
CCR4	PY17X_0915800	protein disulfide isomerase related protein putative	5|6|8	2|0|0	2	3	0.16	0.54|0.00|0.00	0|0|0	0.18	0.54	0.5631
CCR4	PY17X_1102500	rhoptry-associated protein 2/3 RAP2/3	5|6|8	2|0|0	2	3	0.19	0.54|0.00|0.00	0|0|0	0.1783	0.535	0.5639
CCR4	PY17X_1022600	conserved Plasmodium protein unknown function	5|6|8	6|0|0	6	3	0.18	0.53|0.00|0.00	3|0|0	0.1773	0.532	0.5648
CCR4	PY17X_1452800	ATP synthase subunit beta mitochondrial putative	5|6|8	48|13|0	61	3	0.17	0.40|0.14|0.00	16|0|0	0.177	0.396	0.5656
CCR4	PY17X_0523200	ribosome-recycling factor putative RRF2	5|6|8	5|0|0	5	3	0.18	0.53|0.00|0.00	2|0|0	0.1767	0.53	0.5664
CCR4	PY17X_1114500	6-cysteine protein PSOP12	5|6|8	3|0|0	3	3	0.17	0.52|0.00|0.00	0|0|0	0.1737	0.521	0.5672
CCR4	PY17X_0810800	40S ribosomal protein S11 putative RPS11	5|6|8	10|15|6	31	3	0.17	0.14|0.21|0.17	4|2|1	0.1713	0.206	0.568
CCR4	PY17X_1224400	60S ribosomal protein L34 putative RPL34	5|6|8	2|2|3	7	3	0.16	0.09|0.16|0.26	1|1|2	0.1687	0.256	0.5689
CCR4	PY17X_0919400	26S protease regulatory subunit 6A putative RPT5	5|6|8	2|0|0	2	3	0.16	0.50|0.00|0.00	0|0|0	0.168	0.504	0.5697
CCR4	PY17X_0836000	proteasome subunit beta type-6 putative	5|6|8	2|2|0	4	3	0.17	0.23|0.28|0.00	0|2|0	0.1677	0.275	0.5705
CCR4	PY17X_0925600	GrpE protein homolog mitochondrial putative MGE1	5|6|8	14|0|0	14	3	0.16	0.50|0.00|0.00	6|0|0	0.166	0.498	0.5721
CCR4	PY17X_1214000	hypoxanthine-guanine phosphoribosyltransferase putative HGPRT	5|6|8	32|61|19	112	3	0.16	0.09|0.31|0.10	21|15|8	0.166	0.308	0.5713
CCR4	PY17X_1425500	60S ribosomal protein L13-2 putative	5|6|8	8|7|4	19	3	0.17	0.17|0.18|0.14	7|0|0	0.1647	0.184	0.5738
CCR4	PY17X_0831300	zinc finger protein putative	5|6|8	1|2|0	3	3	0.19	0.12|0.37|0.00	0|0|0	0.1647	0.371	0.5738
CCR4	PY17X_0310500	protein SIS1 putative SIS1	5|6|8	2|0|0	2	3	0.16	0.49|0.00|0.00	1|0|0	0.1623	0.487	0.5746
CCR4	PY17X_1307200	CCAAT-binding transcription factor putative	5|6|8	3|0|0	3	3	0.17	0.49|0.00|0.00	0|0|0	0.1617	0.485	0.5754
CCR4	PY17X_0413300	60S ribosomal protein L26 putative	5|6|8	4|0|0	4	3	0.17	0.48|0.00|0.00	2|0|0	0.1593	0.478	0.5762
CCR4	PY17X_1344700	dihydrofolate synthase/folylpolyglutamate synthase putative DHFS-FPGS	5|6|8	2|0|0	2	3	0.17	0.48|0.00|0.00	0|0|0	0.1587	0.476	0.577
CCR4	PY17X_0618100	serine--tRNA ligase putative	5|6|8	2|0|0	2	3	0.16	0.47|0.00|0.00	1|0|0	0.158	0.474	0.5778
CCR4	PY17X_0919800	60S ribosomal protein L38 putative RPL38	5|6|8	3|2|0	5	3	0.16	0.24|0.23|0.00	1|1|0	0.1577	0.241	0.5786
CCR4	PY17X_1427600	conserved Plasmodium protein unknown function	5|6|8	2|0|0	2	3	0.15	0.47|0.00|0.00	0|0|0	0.157	0.471	0.5794
CCR4	PY17X_0510000	conserved Plasmodium protein unknown function	5|6|8	2|0|0	2	3	0.15	0.47|0.00|0.00	0|0|0	0.1563	0.469	0.581
CCR4	PY17X_0836500	M18 aspartyl aminopeptidase putative M18AAP	5|6|8	2|0|0	2	3	0.17	0.47|0.00|0.00	0|0|0	0.1563	0.469	0.581
CCR4	PY17X_0617900	calcium-dependent protein kinase 4 putative CDPK4	5|6|8	2|0|0	2	3	0.15	0.46|0.00|0.00	0|0|0	0.1537	0.461	0.5818
CCR4	PY17X_1129200	nicotinate phosphoribosyltransferase putative NAPRT	5|6|8	0|2|0	2	3	0.15	0.00|0.46|0.00	0|0|0	0.153	0.459	0.5825
CCR4	PY17X_0837800	mitochondrial-processing peptidase subunit beta putative MAS1	5|6|8	17|1|0	18	3	0.14	0.39|0.06|0.00	9|0|0	0.1503	0.39	0.5833
CCR4	PY17X_1217200	heat shock protein 60 putative	5|6|8	35|8|0	43	3	0.16	0.40|0.05|0.00	16|0|0	0.15	0.4	0.5841
CCR4	PY17X_0626000	Plasmodium exported protein unknown function	5|6|8	2|0|0	2	3	0.17	0.45|0.00|0.00	0|0|0	0.1487	0.446	0.5849
CCR4	PY17X_0521500	dynamin putative DYN2	5|6|8	0|2|0	2	3	0.17	0.00|0.44|0.00	0|0|0	0.1473	0.442	0.5857
CCR4	PY17X_1137200	CUGBP Elav-like family member 1 putative CELF1	5|6|8	3|2|2	7	3	0.14	0.17|0.17|0.10	1|0|2	0.1463	0.17	0.5873
CCR4	PY17X_1461900	actin I	5|6|8	18|21|17	56	3	0.15	0.08|0.17|0.18	11|2|2	0.1463	0.184	0.5873
CCR4	PY17X_1329400	valine--tRNA ligase putative	5|6|8	3|0|0	3	3	0.16	0.44|0.00|0.00	0|0|0	0.146	0.438	0.5888
CCR4	PY17X_1338600	conserved Plasmodium protein unknown function	5|6|8	2|0|0	2	3	0.16	0.44|0.00|0.00	0|0|0	0.146	0.438	0.5888
CCR4	PY17X_0931900	heat shock protein 90 putative	5|6|8	20|0|0	20	3	0.14	0.44|0.00|0.00	10|0|0	0.145	0.435	0.5904
CCR4	PY17X_1105300	2-oxoisovalerate dehydrogenase subunit beta mitochondrial putative BCKDHB	5|6|8	13|0|0	13	3	0.15	0.44|0.00|0.00	7|0|0	0.145	0.435	0.5904
CCR4	PY17X_0826800	glutamine synthetase putative	5|6|8	2|0|0	2	3	0.14	0.43|0.00|0.00	0|0|0	0.1433	0.43	0.5911
CCR4	PY17X_1446500	macrophage migration inhibitory factor MIF	5|6|8	2|0|0	2	3	0.14	0.43|0.00|0.00	1|0|0	0.1423	0.427	0.5919
CCR4	PY17X_1314600	40S ribosomal protein S5 putative	5|6|8	9|10|2	21	3	0.15	0.14|0.20|0.09	4|4|0	0.1413	0.195	0.5927
CCR4	PY17X_1368600	lysine--tRNA ligase putative	5|6|8	2|0|0	2	3	0.14	0.42|0.00|0.00	0|0|0	0.1393	0.418	0.5934
CCR4	PY17X_1350400	elongation factor Tu putative	5|6|8	27|3|0	30	3	0.14	0.38|0.03|0.00	13|0|0	0.138	0.383	0.5942
CCR4	PY17X_1370900	conserved Plasmodium protein unknown function	5|6|8	0|3|0	3	3	0.15	0.00|0.41|0.00	0|0|0	0.1367	0.41	0.595
CCR4	PY17X_0607900	conserved Plasmodium protein unknown function	5|6|8	2|0|0	2	3	0.13	0.41|0.00|0.00	0|0|0	0.136	0.408	0.5957
CCR4	PY17X_1142700	glycine cleavage system T protein putative GCVT	5|6|8	8|0|0	8	3	0.13	0.40|0.00|0.00	4|0|0	0.1347	0.404	0.5965
CCR4	PY17X_1323000	AP-1 complex subunit gamma putative	5|6|8	3|0|0	3	3	0.13	0.39|0.00|0.00	0|0|0	0.1313	0.394	0.5972
CCR4	PY17X_1117500	malate:quinone oxidoreductase putative MQO	5|6|8	6|0|0	6	3	0.12	0.39|0.00|0.00	3|0|0	0.129	0.387	0.598
CCR4	PY17X_1414300	conserved Plasmodium protein unknown function	5|6|8	2|0|0	2	3	0.14	0.39|0.00|0.00	0|0|0	0.1287	0.386	0.5988
CCR4	PY17X_0807700	AAA family ATPase putative	5|6|8	2|0|0	2	3	0.13	0.39|0.00|0.00	0|0|0	0.1283	0.385	0.5995
CCR4	PY17X_1134900	elongation factor 1-alpha putative	5|6|8	60|73|32	165	3	0.12	0.10|0.23|0.05	33|38|12	0.1273	0.228	0.6003
CCR4	PY17X_0111600	60S ribosomal protein L39 putative	5|6|8	2|0|0	2	3	0.12	0.38|0.00|0.00	1|0|0	0.127	0.381	0.6011
CCR4	PY17X_1334400	26S proteasome regulatory subunit RPN2 putative RPN2	5|6|8	3|0|0	3	3	0.12	0.37|0.00|0.00	0|0|0	0.1247	0.374	0.6018
CCR4	PY17X_1450200	elongation factor G putative EF-G	5|6|8	2|0|0	2	3	0.13	0.37|0.00|0.00	0|0|0	0.1233	0.37	0.6026
CCR4	PY17X_1119900	conserved Plasmodium protein unknown function	5|6|8	4|0|0	4	3	0.12	0.37|0.00|0.00	3|0|0	0.1223	0.367	0.6033
CCR4	PY17X_1444400	ATP-dependent RNA helicase putative	5|6|8	2|0|0	2	3	0.11	0.36|0.00|0.00	0|0|0	0.1203	0.361	0.6041
CCR4	PY17X_1211500	conserved Plasmodium protein unknown function	5|6|8	2|0|0	2	3	0.14	0.36|0.00|0.00	0|0|0	0.12	0.36	0.6049
CCR4	PY17X_0709300	60S ribosomal protein L22 putative	5|6|8	5|1|0	6	3	0.12	0.22|0.13|0.00	4|0|0	0.1183	0.224	0.6056
CCR4	PY17X_1423900	GTP-binding translation elongation factor putative	5|6|8	2|0|0	2	3	0.12	0.35|0.00|0.00	0|0|0	0.1173	0.352	0.6064
CCR4	PY17X_1305000	proteasome subunit alpha type-1 putative	5|6|8	4|3|1	8	3	0.12	0.13|0.15|0.07	2|2|0	0.116	0.148	0.6071
CCR4	PY17X_0504700	60S ribosomal protein L30e putative	5|6|8	3|0|0	3	3	0.12	0.35|0.00|0.00	2|0|0	0.115	0.345	0.6079
CCR4	PY17X_1431800	proline--tRNA ligase putative PRS	5|6|8	2|0|0	2	3	0.11	0.34|0.00|0.00	0|0|0	0.112	0.336	0.6086
CCR4	PY17X_0712100	heat shock protein 70 putative HSP70	5|6|8	63|101|35	199	3	0.11	0.01|0.19|0.13	35|33|11	0.1117	0.191	0.6094
CCR4	PY17X_1411800	26S protease regulatory subunit 7 putative RPT1	5|6|8	0|2|0	2	3	0.11	0.00|0.33|0.00	0|2|0	0.111	0.333	0.6101
CCR4	PY17X_0911600	protein phosphatase PPM2 putative PPM2	5|6|8	2|0|0	2	3	0.12	0.33|0.00|0.00	0|0|0	0.1097	0.329	0.6109
CCR4	PY17X_1449400	dihydrolipoyl dehydrogenase mitochondrial putative LPD1	5|6|8	36|14|0	50	3	0.1	0.23|0.10|0.00	18|0|0	0.1083	0.228	0.6124
CCR4	PY17X_1234300	RAP protein putative	5|6|8	2|0|0	2	3	0.12	0.33|0.00|0.00	0|0|0	0.1083	0.325	0.6116
CCR4	PY17X_1011600	mitochondrial acidic protein MAM33 putative	5|6|8	3|0|0	3	3	0.11	0.32|0.00|0.00	2|0|0	0.1077	0.323	0.6131
CCR4	PY17X_0606700	zinc finger protein putative	5|6|8	3|0|0	3	3	0.12	0.32|0.00|0.00	0|0|0	0.107	0.321	0.6139
CCR4	PY17X_0924300	threonine--tRNA ligase putative ThrRS	5|6|8	2|0|0	2	3	0.11	0.32|0.00|0.00	0|0|0	0.1057	0.317	0.6146
CCR4	PY17X_1207600	DNA/RNA-binding protein Alba 3 putative ALBA3	5|6|8	10|7|1	18	3	0.1	0.12|0.13|0.06	3|3|0	0.105	0.133	0.6154
CCR4	PY17X_0104400	conserved Plasmodium protein unknown function	5|6|8	3|0|0	3	3	0.12	0.31|0.00|0.00	0|0|0	0.104	0.312	0.6161
CCR4	PY17X_1464400	26S protease regulatory subunit 8 putative RPT6	5|6|8	6|5|3	14	3	0.1	0.11|0.11|0.08	2|4|0	0.1023	0.113	0.6168
CCR4	PY17X_1360800	40S ribosomal protein S6 putative	5|6|8	9|10|8	27	3	0.1	0.09|0.12|0.09	5|4|1	0.1003	0.12	0.6176
CCR4	PY17X_1351600	60S ribosomal protein L23 putative	5|6|8	5|1|0	6	3	0.11	0.19|0.10|0.00	3|1|0	0.0983	0.191	0.6183
CCR4	PY17X_0823100	gamma-glutamylcysteine synthetase gammaGCS	5|6|8	2|0|0	2	3	0.09	0.29|0.00|0.00	0|0|0	0.096	0.288	0.6191
CCR4	PY17X_1433000	thioredoxin peroxidase 2 putative Trx-Px2	5|6|8	10|2|0	12	3	0.09	0.20|0.08|0.00	7|0|0	0.095	0.203	0.6198
CCR4	PY17X_1238600	conserved Plasmodium protein unknown function	5|6|8	8|1|0	9	3	0.1	0.17|0.11|0.00	8|0|0	0.094	0.169	0.6205
CCR4	PY17X_0930500	ATP-dependent zinc metalloprotease FTSH putative	5|6|8	2|0|0	2	3	0.1	0.27|0.00|0.00	2|0|0	0.0883	0.265	0.6213
CCR4	PY17X_0944400	histone H4 putative	5|6|8	8|8|19	35	3	0.08	0.04|0.07|0.15	9|1|18	0.0843	0.15	0.6221
CCR4	PY17X_0620800	conserved Plasmodium protein unknown function	5|6|8	2|0|0	2	3	0.08	0.25|0.00|0.00	2|0|0	0.0817	0.245	0.6228
CCR4	PY17X_0941000	succinyl-CoA synthetase alpha subunit putative	5|6|8	21|11|1	33	3	0.07	0.12|0.08|0.04	14|0|0	0.0793	0.119	0.6236
CCR4	PY17X_0102400	conserved Plasmodium protein unknown function	5|6|8	2|0|0	2	3	0.07	0.23|0.00|0.00	0|0|0	0.078	0.234	0.6243
CCR4	PY17X_0420100	AP-4 complex subunit epsilon putative	5|6|8	2|0|0	2	3	0.08	0.23|0.00|0.00	0|0|0	0.0773	0.232	0.6251
CCR4	PY17X_0110400	histone H3 putative	5|6|8	2|1|9	12	3	0.08	0.02|0.02|0.19	2|3|8	0.0767	0.188	0.6259
CCR4	PY17X_1127700	protein DJ-1 putative DJ1	5|6|8	3|0|0	3	3	0.08	0.22|0.00|0.00	3|0|0	0.0743	0.223	0.6274
CCR4	PY17X_0507200	conserved Plasmodium protein unknown function	5|6|8	0|2|0	2	3	0.08	0.00|0.22|0.00	0|0|0	0.0743	0.223	0.6274
CCR4	PY17X_1014600	60S ribosomal protein L14 putative	5|6|8	7|4|4	15	3	0.07	0.08|0.08|0.05	4|2|0	0.0723	0.084	0.6281
CCR4	PY17X_1102400	conserved rodent malaria protein unknown function	5|6|8	3|4|2	9	3	0.07	0.05|0.06|0.10	3|4|1	0.0683	0.101	0.6289
CCR4	PY17X_1234400	40S ribosomal protein S11 putative	5|6|8	14|4|5	23	3	0.07	0.06|0.05|0.08	10|1|1	0.0613	0.076	0.6297
CCR4	PY17X_1328200	60S ribosomal protein L27 putative RPL27	5|6|8	7|9|3	19	3	0.06	0.06|0.08|0.04	4|2|1	0.0583	0.078	0.6305
CCR4	PY17X_0315000	40S ribosomal protein S26 putative RPS26	5|6|8	4|3|1	8	3	0.06	0.07|0.07|0.03	4|0|1	0.0577	0.073	0.6312
CCR4	PY17X_1014700	ATP-specific succinyl-CoA synthetase beta subunit putative	5|6|8	30|15|0	45	3	0.06	0.11|0.06|0.00	20|0|0	0.056	0.11	0.632
CCR4	PY17X_0405200	60S ribosomal protein L44 putative	5|6|8	4|0|1	5	3	0.05	0.08|0.00|0.09	6|0|0	0.0557	0.092	0.6328
CCR4	PY17X_0944000	40S ribosomal protein S4 putative	5|6|8	14|8|5	27	3	0.04	0.07|0.05|0.03	7|4|0	0.049	0.066	0.6344
CCR4	PY17X_1127000	pyruvate kinase putative	5|6|8	23|35|9	67	3	0.05	0.03|0.08|0.04	14|7|3	0.049	0.078	0.6344
CCR4	PY17X_0309800	conserved Plasmodium protein unknown function	5|6|8	2|2|0	4	3	0.06	0.06|0.09|0.00	0|0|0	0.0473	0.087	0.6352
CCR4	PY17X_0907900	60S ribosomal protein L28 putative	5|6|8	5|0|2	7	3	0.04	0.08|0.00|0.05	6|0|0	0.0433	0.078	0.636
CCR4	PY17X_0808800	heat shock protein 90 putative HSP90	5|6|8	42|43|19	104	3	0.04	0.02|0.05|0.04	17|15|6	0.038	0.047	0.6368
CCR4	PY17X_1357200	elongation factor 1-gamma putative	5|6|8	18|12|9	39	3	0.04	0.04|0.04|0.03	13|4|1	0.0363	0.042	0.6376
CCR4	PY17X_0806100	40S ribosomal protein S29 putative	5|6|8	2|0|0	2	3	0.04	0.11|0.00|0.00	3|0|0	0.0357	0.107	0.6384
CCR4	PY17X_0512000	40S ribosomal protein S2 putative RPS2	5|6|8	9|3|1	13	3	0.04	0.05|0.03|0.02	6|2|1	0.0353	0.05	0.6391
CCR4	PY17X_1330200	glyceraldehyde-3-phosphate dehydrogenase putative GAPDH	5|6|8	20|26|14	60	3	0.04	0.01|0.03|0.05	12|13|5	0.0327	0.053	0.6399
CCR4	PY17X_1136600	40S ribosomal protein S15 putative RPS15	5|6|8	8|6|5	19	3	0.03	0.03|0.04|0.03	8|2|0	0.0313	0.036	0.6407
CCR4	PY17X_0907800	60S ribosomal protein L35ae putative	5|6|8	9|3|0	12	3	0.03	0.06|0.04|0.00	4|3|0	0.031	0.055	0.6415
CCR4	PY17X_1409300	60S ribosomal protein L24 putative	5|6|8	5|9|5	19	3	0.03	0.02|0.03|0.04	5|4|0	0.0307	0.035	0.6423
CCR4	PY17X_0924100	40S ribosomal protein S18 putative	5|6|8	7|6|5	18	3	0.03	0.03|0.04|0.02	6|0|2	0.0303	0.039	0.6431
CCR4	PY17X_1114100	purine nucleoside phosphorylase putative PNP	5|6|8	18|11|4	33	3	0.03	0.03|0.03|0.02	6|6|2	0.0297	0.034	0.6439
CCR4	PY17X_1112200	RNA pseudouridylate synthase putative	5|6|8	3|5|0	8	3	0.03	0.02|0.06|0.00	0|0|0	0.0293	0.064	0.6447
CCR4	PY17X_0932300	GTP-binding nuclear protein RAN/TC4 putative	5|6|8	20|12|8	40	3	0.03	0.03|0.03|0.03	9|4|3	0.029	0.03	0.6455
CCR4	PY17X_1143100	ubiquitin-60S ribosomal protein L40 putative	5|6|8	13|0|0	13	3	0.03	0.08|0.00|0.00	13|0|0	0.0273	0.082	0.6463
CCR4	PY17X_0710300	2-oxoglutarate dehydrogenase E1 component putative	5|6|8	162|134|0	296	3	0.03	0.01|0.07|0.00	95|23|0	0.027	0.073	0.647
CCR4	PY17X_1405500	conserved Plasmodium protein unknown function	5|6|8	0|2|0	2	3	0.03	0.00|0.08|0.00	0|0|0	0.025	0.075	0.6478
CCR4	PY17X_0915900	heat shock protein 70 putative UIS24	5|6|8	54|26|0	80	3	0.03	0.04|0.02|0.00	37|2|0	0.0227	0.044	0.6486
CCR4	PY17X_1336600	helicase 45 putative eIF4A	5|6|8	30|21|10	61	3	0.02	0.02|0.02|0.02	13|11|2	0.0217	0.024	0.6494
CCR4	PY17X_1107800	60S ribosomal protein L4 putative RPL4	5|6|8	21|12|9	42	3	0.02	0.02|0.02|0.03	16|4|3	0.021	0.026	0.6501
CCR4	PY17X_0420300	60S ribosomal protein L32 putative RPL32	5|6|8	6|4|0	10	3	0.02	0.02|0.03|0.00	7|3|0	0.0167	0.028	0.6509
CCR4	PY17X_1232700	60S ribosomal protein L19 putative	5|6|8	4|3|5	12	3	0.01	0.02|0.02|0.02	6|3|0	0.0157	0.016	0.6517
CCR4	PY17X_1318600	elongation factor 2 putative eEF2	5|6|8	46|70|34	150	3	0.01	0.00|0.02|0.02	21|39|7	0.0147	0.022	0.6525
CCR4	PY17X_1237600	40S ribosomal protein S24 putative RPS24	5|6|8	4|10|1	15	3	0.01	0.01|0.03|0.01	6|7|1	0.013	0.025	0.6541
CCR4	PY17X_1343300	60S ribosomal protein L23 putative RPL23	5|6|8	1|2|3	6	3	0.02	0.01|0.01|0.02	3|2|3	0.013	0.021	0.6541
CCR4	PY17X_0806700	60S ribosomal protein L37 putative RPL37	5|6|8	3|2|0	5	3	0.01	0.01|0.02|0.00	2|3|0	0.0107	0.018	0.6548
CCR4	PY17X_1312400	fructose-bisphosphate aldolase 2 ALDO2	5|6|8	20|12|11	43	3	0.01	0.01|0.01|0.01	11|6|3	0.0097	0.012	0.6556
CCR4	PY17X_1344800	L-lactate dehydrogenase LDH	5|6|8	13|2|2	17	3	0.01	0.01|0.01|0.01	14|4|0	0.0067	0.008	0.6564
CCR4	PY17X_0939700	60S ribosomal protein L36 putative RPL36	5|6|8	6|2|1	9	3	0.01	0.01|0.01|0.00	4|4|3	0.0057	0.007	0.6572
CCR4	PY17X_0513000	60S ribosomal protein L3 putative RPL3	5|6|8	11|10|7	28	3	0.01	0.01|0.01|0.00	9|4|2	0.005	0.008	0.6587
CCR4	PY17X_1422300	histone H2B variant putative H2B.Z	5|6|8	3|0|6	9	3	0.01	0.00|0.00|0.01	2|3|5	0.005	0.013	0.6587
CCR4	PY17X_1220800	histone H2A variant putative H2A.Z	5|6|8	0|3|10	13	3	0	0.00|0.00|0.01	5|6|5	0.0047	0.01	0.6595
CCR4	PY17X_1360100	60S ribosomal protein L18-2 putative	5|6|8	7|4|5	16	3	0	0.00|0.00|0.01	8|7|2	0.0043	0.007	0.6603
CCR4	PY17X_1238200	40S ribosomal protein S9 putative	5|6|8	9|7|5	21	3	0	0.00|0.01|0.00	5|3|4	0.003	0.005	0.6618
CCR4	PY17X_1425300	DNA/RNA-binding protein Alba 1 putative ALBA1	5|6|8	15|13|8	36	3	0	0.01|0.00|0.00	11|7|2	0.003	0.005	0.6618
CCR4	PY17X_1036300	40S ribosomal protein S8e putative	5|6|8	12|8|5	25	3	0	0.00|0.00|0.00	9|5|0	0.0027	0.004	0.6626
CCR4	PY17X_0944300	histone H2B putative H2B	5|6|8	4|3|7	14	3	0.01	0.00|0.00|0.00	4|2|5	0.0023	0.003	0.6641
CCR4	PY17X_1235100	60S ribosomal protein L2 putative RPL2	5|6|8	11|11|6	28	3	0	0.00|0.00|0.00	12|2|4	0.0023	0.004	0.6641
CCR4	PY17X_0925400	60S ribosomal protein L35 putative	5|6|8	3|2|0	5	3	0	0.00|0.00|0.00	4|3|2	0.002	0.003	0.6656
CCR4	PY17X_1306600	thioredoxin peroxidase putative TPx1	5|6|8	10|9|6	25	3	0	0.00|0.00|0.00	7|7|4	0.002	0.002	0.6656
CCR4	PY17X_1020900	60S ribosomal protein L7-3 putative	5|6|8	12|13|7	32	3	0	0.00|0.00|0.00	9|6|2	0.0007	0.001	0.6663
CCR4	PY17X_0105400	RNA-binding protein putative	5|6|8	1|0|0	1	3	0	0.00|0.00|0.00	1|0|0	0	0	0.8736
CCR4	PY17X_0312900	DNA-directed RNA polymerase II subunit RPB2 putative RPB2	5|6|8	1|0|0	1	3	0	0.00|0.00|0.00	1|0|0	0	0	0.8736
CCR4	PY17X_0712800	14-3-3 protein putative 14-3-3I	5|6|8	13|12|8	33	3	0	0.00|0.00|0.00	13|6|3	0	0	0.8736
CCR4	PY17X_0925700	ethanolamine kinase putative EK	5|6|8	1|0|0	1	3	0	0.00|0.00|0.00	1|0|0	0	0	0.8736
CCR4	PY17X_1012900	DNA topoisomerase 2 putative TOP2	5|6|8	1|0|1	2	3	0	0.00|0.00|0.00	1|0|0	0	0	0.8736
CCR4	PY17X_1106500	small ubiquitin-related modifier putative SUMO	5|6|8	0|0|1	1	3	0	0.00|0.00|0.00	1|0|0	0	0	0.8736
CCR4	PY17X_1122100	nascent polypeptide associated complex alpha chain putative	5|6|8	1|0|0	1	3	0	0.00|0.00|0.00	1|0|0	0	0	0.8736
CCR4	PY17X_1139300	proliferating cell nuclear antigen 1 putative PCNA1	5|6|8	1|0|0	1	3	0	0.00|0.00|0.00	2|1|0	0	0	0.8736
CCR4	PY17X_1209100	transcription factor with AP2 domains putative ApiAP2	5|6|8	0|0|1	1	3	0	0.00|0.00|0.00	1|0|0	0	0	0.8736
CCR4	PY17X_1236500	proteasome subunit beta type-1 putative	5|6|8	1|0|0	1	3	0	0.00|0.00|0.00	2|0|0	0	0	0.8736
CCR4	PY17X_1245000	DNA replication licensing factor MCM3 putative MCM3	5|6|8	1|0|1	2	3	0	0.00|0.00|0.00	2|0|0	0	0	0.8736
CCR4	PY17X_1333000	ATP-dependent zinc metalloprotease FTSH putative	5|6|8	1|0|0	1	3	0	0.00|0.00|0.00	2|0|0	0	0	0.8736
CCR4	PY17X_1341400	conserved Plasmodium protein unknown function	5|6|8	1|0|0	1	3	0	0.00|0.00|0.00	2|0|0	0	0	0.8736
CCR4	PY17X_1345000	phosphoribosylpyrophosphate synthetase putative	5|6|8	1|0|0	1	3	0	0.00|0.00|0.00	1|0|0	0	0	0.8736
CCR4	PY17X_1426300	conserved Plasmodium protein unknown function	5|6|8	1|0|1	2	3	0	0.00|0.00|0.00	2|1|0	0	0	0.8736
CCR4	PY17X_1447600	ATP-dependent protease subunit ClpQ putative	5|6|8	1|0|0	1	3	0	0.00|0.00|0.00	1|0|0	0	0	0.8736
CCR4	PY17X_0622400	rhoptry-associated leucine zipper-like protein 1 putative RALP1	5|6|8	1|1|1	3	3	0	0.00|0.00|0.00	0|2|0	0	0	0.8736
CCR4	PY17X_1464200	conserved Plasmodium protein unknown function	5|6|8	1|0|0	1	3	0	0.00|0.00|0.00	0|1|0	0	0	0.8736
CCR4	PY17X_0713300	rhoptry neck protein 5 RON5	5|6|8	0|0|1	1	3	0	0.00|0.00|0.00	0|0|0	0	0	0.8736
CCR4	PY17X_0103000	conserved Plasmodium protein unknown function	5|6|8	1|0|0	1	3	0	0.00|0.00|0.00	0|0|0	0	0	0.8736
CCR4	PY17X_0105300	50S ribosomal protein L24 putative	5|6|8	1|0|0	1	3	0	0.00|0.00|0.00	0|0|0	0	0	0.8736
CCR4	PY17X_0107000	glutaredoxin-like protein GLP2	5|6|8	1|0|0	1	3	0	0.00|0.00|0.00	0|0|0	0	0	0.8736
CCR4	PY17X_0111800	lsm12 putative	5|6|8	1|0|0	1	3	0	0.00|0.00|0.00	0|0|0	0	0	0.8736
CCR4	PY17X_0206700	conserved Plasmodium protein unknown function	5|6|8	1|0|0	1	3	0	0.00|0.00|0.00	0|0|0	0	0	0.8736
CCR4	PY17X_0206800	proteasome subunit beta type-3 putative	5|6|8	1|0|0	1	3	0	0.00|0.00|0.00	0|0|0	0	0	0.8736
CCR4	PY17X_0213500	eukaryotic translation initiation factor 2 alpha subunit putative	5|6|8	1|1|0	2	3	0	0.00|0.00|0.00	0|0|0	0	0	0.8736
CCR4	PY17X_0309600	mitochondrial ribosomal protein L12 precursor putative	5|6|8	1|0|0	1	3	0	0.00|0.00|0.00	0|0|0	0	0	0.8736
CCR4	PY17X_0406900	glutaredoxin 1 putative GRX1	5|6|8	1|0|0	1	3	0	0.00|0.00|0.00	0|0|0	0	0	0.8736
CCR4	PY17X_0413700	conserved Plasmodium protein unknown function	5|6|8	1|0|0	1	3	0	0.00|0.00|0.00	0|0|0	0	0	0.8736
CCR4	PY17X_0420800	DEAD/DEAH box helicase putative	5|6|8	1|0|0	1	3	0	0.00|0.00|0.00	0|0|0	0	0	0.8736
CCR4	PY17X_0510400	glutamine--fructose-6-phosphate aminotransferase [isomerizing] putative	5|6|8	1|0|0	1	3	0	0.00|0.00|0.00	0|0|0	0	0	0.8736
CCR4	PY17X_0515500	26S proteasome regulatory subunit RPN9 putative RPN9	5|6|8	1|0|1	2	3	0	0.00|0.00|0.00	0|0|0	0	0	0.8736
CCR4	PY17X_0519800	methionine--tRNA ligase putative	5|6|8	1|1|0	2	3	0	0.00|0.00|0.00	0|0|0	0	0	0.8736
CCR4	PY17X_0524300	pre-mRNA-splicing helicase BRR2 putative BRR2	5|6|8	1|0|0	1	3	0	0.00|0.00|0.00	0|0|0	0	0	0.8736
CCR4	PY17X_0524400	conserved Plasmodium protein unknown function	5|6|8	1|0|0	1	3	0	0.00|0.00|0.00	0|0|0	0	0	0.8736
CCR4	PY17X_0603100	XPA binding protein 1 putative	5|6|8	1|0|0	1	3	0	0.00|0.00|0.00	0|0|0	0	0	0.8736
CCR4	PY17X_0607800	eukaryotic translation initiation factor 5 putative	5|6|8	1|0|0	1	3	0	0.00|0.00|0.00	0|0|0	0	0	0.8736
CCR4	PY17X_0621300	conserved Plasmodium protein unknown function	5|6|8	1|0|0	1	3	0	0.00|0.00|0.00	0|0|0	0	0	0.8736
CCR4	PY17X_0622900	conserved Plasmodium protein unknown function	5|6|8	1|0|0	1	3	0	0.00|0.00|0.00	0|0|0	0	0	0.8736
CCR4	PY17X_0701800	prohibitin putative	5|6|8	1|0|0	1	3	0	0.00|0.00|0.00	0|0|0	0	0	0.8736
CCR4	PY17X_0707100	DnaJ protein putative	5|6|8	1|0|0	1	3	0	0.00|0.00|0.00	0|0|0	0	0	0.8736
CCR4	PY17X_0709000	mitochondrial ribosomal protein L4 precursor putative	5|6|8	1|0|0	1	3	0	0.00|0.00|0.00	0|0|0	0	0	0.8736
CCR4	PY17X_0712500	zinc finger protein putative	5|6|8	1|0|0	1	3	0	0.00|0.00|0.00	0|0|0	0	0	0.8736
CCR4	PY17X_0715800	26S protease regulatory subunit 6B putative RPT3	5|6|8	1|0|0	1	3	0	0.00|0.00|0.00	0|0|0	0	0	0.8736
CCR4	PY17X_0805000	E3 ubiquitin-protein ligase putative	5|6|8	1|0|0	1	3	0	0.00|0.00|0.00	0|0|0	0	0	0.8736
CCR4	PY17X_0814900	selenide water dikinase putative	5|6|8	1|0|0	1	3	0	0.00|0.00|0.00	0|0|0	0	0	0.8736
CCR4	PY17X_0823200	nucleosome assembly protein NAPS	5|6|8	1|0|1	2	3	0	0.00|0.00|0.00	0|0|0	0	0	0.8736
CCR4	PY17X_0826300	ubiquitin-like protein putative	5|6|8	1|0|0	1	3	0	0.00|0.00|0.00	0|0|0	0	0	0.8736
CCR4	PY17X_0828100	RNA-binding protein putative	5|6|8	1|0|0	1	3	0	0.00|0.00|0.00	0|0|0	0	0	0.8736
CCR4	PY17X_0828500	thiamine pyrophosphokinase putative TPK	5|6|8	1|0|0	1	3	0	0.00|0.00|0.00	0|0|0	0	0	0.8736
CCR4	PY17X_0902800	mitochondrial ATP synthase delta subunit putative	5|6|8	1|0|0	1	3	0	0.00|0.00|0.00	0|0|0	0	0	0.8736
CCR4	PY17X_0906400	40S ribosomal protein S21 putative RPS21	5|6|8	1|0|0	1	3	0	0.00|0.00|0.00	0|0|0	0	0	0.8736
CCR4	PY17X_0915500	conserved Plasmodium protein unknown function	5|6|8	1|0|0	1	3	0	0.00|0.00|0.00	0|0|0	0	0	0.8736
CCR4	PY17X_0920700	26S proteasome regulatory subunit RPN7 putative RPN7	5|6|8	1|1|0	2	3	0	0.00|0.00|0.00	0|0|0	0	0	0.8736
CCR4	PY17X_0920900	fam-d protein	5|6|8	1|0|0	1	3	0	0.00|0.00|0.00	0|0|0	0	0	0.8736
CCR4	PY17X_0928600	ABC transporter F family member 2 putative GCN20	5|6|8	1|0|0	1	3	0	0.00|0.00|0.00	0|0|0	0	0	0.8736
CCR4	PY17X_1002400	conserved Plasmodium protein unknown function	5|6|8	1|0|0	1	3	0	0.00|0.00|0.00	0|0|0	0	0	0.8736
CCR4	PY17X_1005200	V-type proton ATPase subunit B putative	5|6|8	1|0|0	1	3	0	0.00|0.00|0.00	0|0|0	0	0	0.8736
CCR4	PY17X_1005400	cytosolic glyoxalase II putative	5|6|8	1|0|0	1	3	0	0.00|0.00|0.00	0|0|0	0	0	0.8736
CCR4	PY17X_1007400	conserved Plasmodium protein unknown function	5|6|8	1|0|0	1	3	0	0.00|0.00|0.00	0|0|0	0	0	0.8736
CCR4	PY17X_1009600	conserved Plasmodium protein unknown function	5|6|8	1|0|0	1	3	0	0.00|0.00|0.00	0|0|0	0	0	0.8736
CCR4	PY17X_1009800	cGMP-dependent protein kinase putative PKG	5|6|8	1|0|0	1	3	0	0.00|0.00|0.00	0|0|0	0	0	0.8736
CCR4	PY17X_1020800	enoyl-CoA hydratase putative	5|6|8	1|0|0	1	3	0	0.00|0.00|0.00	0|0|0	0	0	0.8736
CCR4	PY17X_1023200	mitochondrial ribosomal protein L21 precursor putative	5|6|8	1|0|0	1	3	0	0.00|0.00|0.00	0|0|0	0	0	0.8736
CCR4	PY17X_1023900	40S ribosomal protein S25 putative	5|6|8	1|0|1	2	3	0	0.00|0.00|0.00	0|0|0	0	0	0.8736
CCR4	PY17X_1029000	protein SEY1 putative SEY1	5|6|8	1|0|0	1	3	0	0.00|0.00|0.00	0|0|0	0	0	0.8736
CCR4	PY17X_1030700	serine/threonine protein phosphatase PP1 putative PP1	5|6|8	1|0|0	1	3	0	0.00|0.00|0.00	0|0|0	0	0	0.8736
CCR4	PY17X_1035200	conserved Plasmodium protein unknown function	5|6|8	1|0|0	1	3	0	0.00|0.00|0.00	0|0|0	0	0	0.8736
CCR4	PY17X_1103500	conserved Plasmodium protein unknown function	5|6|8	1|0|0	1	3	0	0.00|0.00|0.00	0|0|0	0	0	0.8736
CCR4	PY17X_1119700	cell division cycle protein 48 homologue putative	5|6|8	1|0|0	1	3	0	0.00|0.00|0.00	0|0|0	0	0	0.8736
CCR4	PY17X_1121400	conserved Plasmodium protein unknown function	5|6|8	1|1|0	2	3	0	0.00|0.00|0.00	0|0|0	0	0	0.8736
CCR4	PY17X_1121500	pyridoxine biosynthesis protein PDX1 putative PDX1	5|6|8	1|0|0	1	3	0	0.00|0.00|0.00	0|0|0	0	0	0.8736
CCR4	PY17X_1124400	conserved Plasmodium protein unknown function	5|6|8	1|0|0	1	3	0	0.00|0.00|0.00	0|0|0	0	0	0.8736
CCR4	PY17X_1129400	RAP protein putative	5|6|8	1|0|0	1	3	0	0.00|0.00|0.00	0|0|0	0	0	0.8736
CCR4	PY17X_1146700	Plasmodium exported protein unknown function	5|6|8	1|0|1	2	3	0	0.00|0.00|0.00	0|0|0	0	0	0.8736
CCR4	PY17X_1212400	50S ribosomal protein L22 mitochondrial putative	5|6|8	1|0|0	1	3	0	0.00|0.00|0.00	0|0|0	0	0	0.8736
CCR4	PY17X_1214200	GMP synthetase putative GMPS	5|6|8	1|0|0	1	3	0	0.00|0.00|0.00	0|0|0	0	0	0.8736
CCR4	PY17X_1216600	FAD synthetase putative	5|6|8	1|0|0	1	3	0	0.00|0.00|0.00	0|0|0	0	0	0.8736
CCR4	PY17X_1222100	elongation factor 1 EF-1 putative	5|6|8	1|0|0	1	3	0	0.00|0.00|0.00	0|0|0	0	0	0.8736
CCR4	PY17X_1222600	Cg3 protein putative	5|6|8	1|0|0	1	3	0	0.00|0.00|0.00	0|0|0	0	0	0.8736
CCR4	PY17X_1228200	serine/threonine protein kinase FIKK family	5|6|8	1|0|0	1	3	0	0.00|0.00|0.00	0|0|0	0	0	0.8736
CCR4	PY17X_1228900	GTPase-activating protein putative	5|6|8	1|0|0	1	3	0	0.00|0.00|0.00	0|0|0	0	0	0.8736
CCR4	PY17X_1231500	1-cys peroxiredoxin putative 1-CysPxn	5|6|8	1|0|0	1	3	0	0.00|0.00|0.00	0|0|0	0	0	0.8736
CCR4	PY17X_1239200	conserved Plasmodium protein unknown function	5|6|8	1|0|0	1	3	0	0.00|0.00|0.00	0|0|0	0	0	0.8736
CCR4	PY17X_1242400	cytosolic preribosomal GTP-binding protein putative	5|6|8	1|0|0	1	3	0	0.00|0.00|0.00	0|0|0	0	0	0.8736
CCR4	PY17X_1243800	inner membrane complex protein 1g putative IMC1g	5|6|8	1|0|0	1	3	0	0.00|0.00|0.00	0|0|0	0	0	0.8736
CCR4	PY17X_1246100	AP-1 complex subunit beta putative	5|6|8	1|0|0	1	3	0	0.00|0.00|0.00	0|0|0	0	0	0.8736
CCR4	PY17X_1248300	conserved Plasmodium protein unknown function	5|6|8	1|0|0	1	3	0	0.00|0.00|0.00	0|0|0	0	0	0.8736
CCR4	PY17X_1249100	mitochondrial ribosomal protein S16 precursor putative	5|6|8	1|0|0	1	3	0	0.00|0.00|0.00	0|0|0	0	0	0.8736
CCR4	PY17X_1312900	mitochondrial ribosomal protein S29 precursor putative	5|6|8	1|0|0	1	3	0	0.00|0.00|0.00	0|0|0	0	0	0.8736
CCR4	PY17X_1316300	Appr-1-p processing domain protein	5|6|8	1|0|0	1	3	0	0.00|0.00|0.00	0|0|0	0	0	0.8736
CCR4	PY17X_1317900	conserved Plasmodium protein unknown function	5|6|8	1|0|0	1	3	0	0.00|0.00|0.00	0|0|0	0	0	0.8736
CCR4	PY17X_1318400	acetyl-CoA acetyltransferase putative	5|6|8	1|0|0	1	3	0	0.00|0.00|0.00	0|0|0	0	0	0.8736
CCR4	PY17X_1324100	mitochondrial ribosomal protein L28 precursor putative	5|6|8	1|0|0	1	3	0	0.00|0.00|0.00	0|0|0	0	0	0.8736
CCR4	PY17X_1326500	ATP-dependent RNA helicase DBP5 putative	5|6|8	1|0|0	1	3	0	0.00|0.00|0.00	0|0|0	0	0	0.8736
CCR4	PY17X_1328800	40S ribosomal protein S28e putative	5|6|8	1|0|0	1	3	0	0.00|0.00|0.00	0|0|0	0	0	0.8736
CCR4	PY17X_1333100	conserved Plasmodium protein unknown function	5|6|8	1|0|0	1	3	0	0.00|0.00|0.00	0|0|0	0	0	0.8736
CCR4	PY17X_1370100	glycerol kinase putative	5|6|8	1|0|0	1	3	0	0.00|0.00|0.00	0|0|0	0	0	0.8736
CCR4	PY17X_1403100	conserved Plasmodium protein unknown function	5|6|8	1|0|0	1	3	0	0.00|0.00|0.00	0|0|0	0	0	0.8736
CCR4	PY17X_1410100	conserved Plasmodium protein unknown function	5|6|8	1|0|0	1	3	0	0.00|0.00|0.00	0|0|0	0	0	0.8736
CCR4	PY17X_1415800	CDP-diacylglycerol--inositol 3-phosphatidyltransferase putative PIS	5|6|8	1|0|0	1	3	0	0.00|0.00|0.00	0|0|0	0	0	0.8736
CCR4	PY17X_1421900	mitochondrial ribosomal protein S5 precursor putative	5|6|8	1|0|0	1	3	0	0.00|0.00|0.00	0|0|0	0	0	0.8736
CCR4	PY17X_1434200	glycerol-3-phosphate dehydrogenase putative	5|6|8	1|1|0	2	3	0	0.00|0.00|0.00	0|0|0	0	0	0.8736
CCR4	PY17X_1436500	conserved Plasmodium protein unknown function	5|6|8	1|0|0	1	3	0	0.00|0.00|0.00	0|0|0	0	0	0.8736
CCR4	PY17X_1443200	ubiquitin-activating enzyme E1 putative	5|6|8	1|1|0	2	3	0	0.00|0.00|0.00	0|0|0	0	0	0.8736
CCR4	PY17X_1456900	3-hydroxyisobutyryl-coenzyme A hydrolase putative	5|6|8	1|0|0	1	3	0	0.00|0.00|0.00	0|0|0	0	0	0.8736
CCR4	PY17X_1457100	conserved Plasmodium protein unknown function	5|6|8	1|0|0	1	3	0	0.00|0.00|0.00	0|0|0	0	0	0.8736
CCR4	PY17X_1324700	thioredoxin 1 putative TRX1	5|6|8	0|1|0	1	3	0	0.00|0.00|0.00	0|0|0	0	0	0.8736
CCR4	PY17X_1131900	proteasome subunit alpha type-7 putative	5|6|8	0|1|0	1	3	0	0.00|0.00|0.00	0|0|0	0	0	0.8736
CCR4	PY17X_1113500	orotate phosphoribosyltransferase putative OPRT	5|6|8	0|1|0	1	3	0	0.00|0.00|0.00	0|0|0	0	0	0.8736
CCR4	PY17X_0921400	spermidine synthase putative	5|6|8	0|1|1	2	3	0	0.00|0.00|0.00	0|0|0	0	0	0.8736
CCR4	PY17X_1354900	conserved Plasmodium protein unknown function	5|6|8	0|1|0	1	3	0	0.00|0.00|0.00	0|0|0	0	0	0.8736
CCR4	PY17X_1357000	26S proteasome regulatory subunit RPN3 putative RPN3	5|6|8	0|1|0	1	3	0	0.00|0.00|0.00	0|0|0	0	0	0.8736
CCR4	PY17X_0614300	N-acetyltransferase putative	5|6|8	0|1|0	1	3	0	0.00|0.00|0.00	0|0|0	0	0	0.8736
CCR4	PY17X_1129700	RNA-binding protein putative	5|6|8	0|1|0	1	3	0	0.00|0.00|0.00	0|0|0	0	0	0.8736
CCR4	PY17X_1447900	protein transport protein SEC13 putative SEC13	5|6|8	0|1|1	2	3	0	0.00|0.00|0.00	0|0|0	0	0	0.8736
CCR4	PY17X_1460900	kinesin-13 putative	5|6|8	0|1|1	2	3	0	0.00|0.00|0.00	0|0|0	0	0	0.8736
CCR4	PY17X_0403300	serine/threonine protein kinase putative SRPK1	5|6|8	0|1|0	1	3	0	0.00|0.00|0.00	0|0|0	0	0	0.8736
CCR4	PY17X_1452400	CCR4-NOT transcription complex subunit 4 putative NOT4	5|6|8	0|1|0	1	3	0	0.00|0.00|0.00	0|0|0	0	0	0.8736
CCR4	PY17X_1025700	conserved Plasmodium protein unknown function	5|6|8	0|1|0	1	3	0	0.00|0.00|0.00	0|0|0	0	0	0.8736
CCR4	PY17X_0113800	myosin-like protein putative	5|6|8	0|0|1	1	3	0	0.00|0.00|0.00	0|0|0	0	0	0.8736
CCR4	PY17X_0303100	hexose transporter HT	5|6|8	0|0|1	1	3	0	0.00|0.00|0.00	0|0|0	0	0	0.8736
CCR4	PY17X_0312300	long-chain acyl-CoA synthase putative	5|6|8	0|0|1	1	3	0	0.00|0.00|0.00	0|0|0	0	0	0.8736
CCR4	PY17X_0316700	replication factor C subunit 1 putative RFC1	5|6|8	0|0|1	1	3	0	0.00|0.00|0.00	0|0|0	0	0	0.8736
CCR4	PY17X_0419400	replication protein A1 small fragment	5|6|8	0|0|1	1	3	0	0.00|0.00|0.00	0|0|0	0	0	0.8736
CCR4	PY17X_0524500	eukaryotic initiation factor putative	5|6|8	0|0|1	1	3	0	0.00|0.00|0.00	0|0|0	0	0	0.8736
CCR4	PY17X_0810200	DNA-directed RNA polymerase II subunit RPB1 putative RPB1	5|6|8	0|0|1	1	3	0	0.00|0.00|0.00	0|0|0	0	0	0.8736
CCR4	PY17X_0931600	pre-RNA processing ribonucleoprotein putative	5|6|8	0|0|1	1	3	0	0.00|0.00|0.00	0|0|0	0	0	0.8736
CCR4	PY17X_1030300	small nuclear ribonucleoprotein-associated protein B putative SMB1	5|6|8	0|0|1	1	3	0	0.00|0.00|0.00	0|0|0	0	0	0.8736
CCR4	PY17X_1033000	p1/s1 nuclease putative	5|6|8	0|0|1	1	3	0	0.00|0.00|0.00	0|0|0	0	0	0.8736
CCR4	PY17X_1035500	conserved Plasmodium protein unknown function	5|6|8	0|0|1	1	3	0	0.00|0.00|0.00	0|0|0	0	0	0.8736
CCR4	PY17X_1106200	DNA mismatch repair protein MSH6 putative MSH6	5|6|8	0|0|1	1	3	0	0.00|0.00|0.00	0|0|0	0	0	0.8736
CCR4	PY17X_1147700	conserved rodent malaria protein unknown function	5|6|8	0|0|1	1	3	0	0.00|0.00|0.00	0|0|0	0	0	0.8736
CCR4	PY17X_1205100	inner membrane complex protein 1c putative IMC1c	5|6|8	0|0|1	1	3	0	0.00|0.00|0.00	0|0|0	0	0	0.8736
CCR4	PY17X_1313500	ATP-dependent RNA helicase DDX5 putative DDX5	5|6|8	0|0|1	1	3	0	0.00|0.00|0.00	0|0|0	0	0	0.8736
CCR4	PY17X_1324800	conserved Plasmodium protein unknown function	5|6|8	0|0|1	1	3	0	0.00|0.00|0.00	0|0|0	0	0	0.8736
CCR4	PY17X_1355900	endopeptidase putative	5|6|8	0|0|1	1	3	0	0.00|0.00|0.00	0|0|0	0	0	0.8736
CCR4	PY17X_1427000	RNA-binding protein putative	5|6|8	0|0|1	1	3	0	0.00|0.00|0.00	0|0|0	0	0	0.8736
CCR4	PY17X_1454800	conserved protein unknown function	5|6|8	0|0|1	1	3	0	0.00|0.00|0.00	0|0|0	0	0	0.8736
